1 **Systematic analysis of key parameters for genomics-based real-time**  
2 **detection and tracking of multidrug-resistant bacteria**

3

4 Claire L Gorrie (PhD)<sup>1,2</sup>, Anders Goncalves Da Silva (PhD)<sup>1</sup>, Danielle J Ingle (PhD)<sup>2,3</sup>,  
5 Charlie Higgs (BSc)<sup>2</sup>, Torsten Seemann (PhD)<sup>1,2</sup>, Timothy P Stinear (PhD)<sup>2</sup>, Deborah A  
6 Williamson (PhD)<sup>1,2,4</sup>, Jason C Kwong (PhD)<sup>1,5</sup>, M Lindsay Grayson (MD)<sup>5,6</sup>, Norelle L  
7 Sherry (MBBS)<sup>1,2,5</sup>, and Benjamin P Howden (PhD)<sup>1,2,5</sup>

8

9 **Affiliations**

10 <sup>1</sup> Microbiological Diagnostic Unit (MDU) Public Health Laboratory, Department of  
11 Microbiology & Immunology at the Peter Doherty Institute for Infection & Immunity,  
12 University of Melbourne, Melbourne, Victoria, Australia

13 <sup>2</sup> Department of Microbiology & Immunology at the Peter Doherty Institute for Infection &  
14 Immunity, University of Melbourne, Melbourne, Victoria, Australia

15 <sup>3</sup> National Centre for Epidemiology & Population Health, Australian National University,  
16 Canberra, Australian Capital Territory, Australia

17 <sup>4</sup> Department of Microbiology, Royal Melbourne Hospital, Melbourne, Victoria, Australia

18 <sup>5</sup> Departments of Infectious Diseases & Microbiology, Austin Health, Heidelberg, Victoria,  
19 Australia

20 <sup>6</sup> Department of Medicine, Austin Health, University of Melbourne, Heidelberg, Victoria,  
21 Australia

22

23

24

25

26 **ABSTRACT**

27

28 **Background:** Pairwise single nucleotide polymorphisms (SNPs) are a cornerstone for  
29 genomic approaches to multidrug-resistant organisms (MDROs) transmission inference in  
30 hospitals. However, the impact of key analysis parameters on these inferences has not been  
31 systematically analysed.

32

33 **Methods:** We conducted a multi-hospital 15-month prospective study, sequencing 1537  
34 MDRO genomes for comparison; methicillin-resistant *Staphylococcus aureus*, vancomycin-  
35 resistant *Enterococcus faecium*, and extended-spectrum beta-lactamase-producing  
36 *Escherichia coli* and *Klebsiella pneumoniae*. We systematically assessed the impact of  
37 sample and reference genome diversity, masking of prophage and regions of recombination,  
38 cumulative genome analysis compared to a three-month sliding-window, and the comparative  
39 effects each of these had when applying a SNP threshold for inferring likely transmission  
40 ( $\leq 15$  SNPs for *S. aureus*,  $\leq 25$  for other species).

41

42 **Findings:** Across the species, using a reference genome of the same sequence type provided  
43 a greater degree of pairwise SNP resolution, compared to species and outgroup-reference  
44 alignments that typically resulted in inflated SNP distances and the possibility of missed  
45 transmission events. Omitting prophage regions had minimal impacts, however, omitting  
46 recombination regions a highly variable effect, often inflating the number of closely related  
47 pairs. Estimating pairwise SNP distances was more consistent using a sliding-window than a  
48 cumulative approach.

49

50 **Interpretation:** The use of a closely-related reference genome, without masking of prophage  
51 or recombination regions, and a sliding-window for isolate inclusion is best for accurate and  
52 consistent MDRO transmission inference. The increased stability and resolution provided by  
53 these approaches means SNP thresholds for putative transmission inference can be more  
54 reliably applied among diverse MDROs.

55

56 **Funding:** This work was supported by the Melbourne Genomics Health Alliance (funded by  
57 the State Government of Victoria, Department of Health and Human Services, and the ten  
58 member organizations); an National Health and Medical Research Council (Australia)  
59 Partnership grant (GNT1149991) and individual grants from National Health and Medical  
60 Research Council (Australia) to NLS (GNT1093468), JCK (GNT1008549) and BPH  
61 (GNT1105905).

62

63

64 **KEYWORDS (3-10 words)**

65

66 Antimicrobial resistance, bacterial pathogens, transmission, best practice, genomics,  
67 vancomycin-resistant *Enterococcus faecium*, extended-spectrum beta-lactamase, *Klebsiella*  
68 *pneumoniae*, *Escherichia coli*, methicillin-resistant *Staphylococcus aureus*

69 **BACKGROUND**

70

71 Antimicrobial-resistant (AMR) pathogens are amongst the foremost threats to global public  
72 health <sup>1-5</sup>. On an individual level, they lead to increased morbidity and mortality, both in  
73 terms of the initial infection and resulting sequelae or complications, as well as significant  
74 increases in treatment costs and length of hospital stay <sup>6-8</sup>. Consequently, this places an  
75 increasing strain on healthcare systems as the global burden of AMR pathogens rises <sup>6,8-10</sup>.  
76 Among the pathogens of particular concern are multidrug-resistant organism (MDRO)  
77 species such as the ESKAPE pathogens (*Enterococcus faecium*, *Staphylococcus aureus*,  
78 *Klebsiella pneumoniae*, *Acinetobacter baumannii*, *Pseudomonas aeruginosa*, and  
79 *Enterobacter aerogenes*), and *Escherichia coli* <sup>1,11-13</sup>.

80

81 The World Health Organisation recently highlighted the need to invest in resources to  
82 enhance the surveillance of AMR <sup>3</sup>, which can be facilitated through genomics <sup>5,14</sup>. Although  
83 whole genome sequencing (WGS) is increasingly leveraged in public health outbreak  
84 investigations, including for AMR, these have predominantly focused on retrospective  
85 ‘closed’ datasets. In these reports, study-specific analysis approaches have defined single  
86 nucleotide polymorphism (SNP) thresholds for ruling isolates as ‘likely’ or ‘unlikely’ part of  
87 transmission events, based on a combination of genomic and epidemiologic evidence <sup>15-18</sup>,  
88 and some have determined thresholds of genomic diversity between sequences that is  
89 correlated with epidemiological transmission evidence (e.g. SNP distance) <sup>15,16,18</sup>. Whilst  
90 these SNP thresholds perform well in a closed dataset, their application to prospective  
91 genomic surveillance datasets, with different analysis approaches, needs to be evaluated and  
92 developed further, especially when dealing with more complex - genetically or temporally  
93 diverse - datasets.

94

95 Many of the MDROs posing the greatest health threats exhibit significant population  
96 genomic diversity, prolonged asymptomatic colonisation, horizontal gene transfer, and DNA  
97 acquired via homologous recombination. These factors can impact relative genetic  
98 relatedness, so the methods and transmission SNP thresholds used must remain robust  
99 amongst such genomic dynamism. There still remains a significant gap between bespoke  
100 comparative genomics research approaches applied in retrospective studies, and the effective  
101 translation of such approaches into real-time surveillance in clinical settings in order to help  
102 inform infection prevention and control of MDROs.

103

104 To address this knowledge gap, we investigated three major facets of genomics data analysis  
105 with potential for significant impacts on the accurate surveillance and transmission detection,  
106 using a comprehensive genomic and epidemiological dataset for four major hospital MDROs.  
107 These were: i) reference genome choice and level of analysis, i.e. species versus sequence  
108 type; ii) omission of DNA regions predicted to be prophage or acquired by recombination,  
109 and; iii) genome inclusion or exclusion in a growing dataset (cumulative versus a sliding-  
110 window approach). We show that the best approach was using a closely related reference  
111 genome, without omitting prophage or recombination regions, and a sliding-window for  
112 sample inclusion. These methods provided finer-scale resolution and greater consistency and  
113 accuracy in pairwise SNP distances for inferring isolate relatedness, making the application  
114 of a single SNP threshold to define transmission more appropriate than other approaches.  
115 These findings provide the basis for a framework for pathogen-specific standardisation for  
116 MDRO surveillance using genomics.

117 **METHODS**

118

119 **Isolate selection and whole genome sequencing**

120 During a 15-month prospective study (April – June 2017<sup>19</sup> and October 2017 – November  
121 2018) all positive clinical or screening samples for four dominant healthcare-associated  
122 MDROs were collected for WGS from eight hospitals in Melbourne, Australia. This included  
123 all methicillin-resistant *Staphylococcus aureus*, all *vanA* vancomycin-resistant *Enterococcus*  
124 *faecium*, all extended-spectrum beta-lactamase (ESBL) phenotype *Klebsiella pneumoniae*,  
125 and all ESBL ciprofloxacin-resistant *Escherichia coli* (in the first eight weeks, ESBL  
126 ciprofloxacin-susceptible *E. coli* were also included).

127

128 Additional detail on study design, sample collection and identification, and laboratory and  
129 sequencing/bioinformatics workflows available in **Supplementary Methods**.

130

131 To capture diversity within each species and to focus on the dominant genotypes we selected  
132 all sequences representing the four most common multi locus sequence types (STs) of each  
133 species (n=153) (**Table 1, Supplementary Table 1**). Short read sequence data available at  
134 BioProject PRJNA565795.

135

136 **Mapping and single nucleotide polymorphism (SNP) calling**

137 All mapping and SNP calling analyses were conducted using snippy (v4.6.0,  
138 <https://github.com/tseemann/snippy>, *minfrac* 10 and *mincov* 0.9). Additional detail on all  
139 mapping analyses available in **Supplementary Methods**.

140

141 **Pairwise SNP distances and transmission inference thresholds**

142 Pairwise SNPs were calculated in R using harrietr (v0.2.3,  
143 <https://github.com/andersgs/harrietr>) and the core SNP alignments. Transmission inference  
144 thresholds ( $\leq 15$  SNPs for MRSA,  $\leq 25$  SNPs for other species) were applied. More detail  
145 available in **Supplementary Methods**.

146

#### 147 **Figures, data visualisation**

148 All figures were created in R (v3.6.0 as above), using one or more of the following packages:  
149 ggplot2 (v3.3.1), patchwork (v1.0.0, <https://github.com/thomasp85/patchwork>), IRanges  
150 (v2.18.3, <https://github.com/Bioconductor/IRanges>), tidyverse (v1.3.0,  
151 <https://www.tidyverse.org>), and RColorBrewer (v1.1-2, [https://CRAN.R-](https://CRAN.R-project.org/package=RColorBrewer)  
152 [project.org/package=RColorBrewer](https://CRAN.R-project.org/package=RColorBrewer)).

153

#### 154 **Statistical analyses**

155 All statistical analyses were conducted in R, with more detail available in **Supplementary**  
156 **Methods**.

157

#### 158 **Role of the funding source**

159 The funding sources had no involvement in the study design; in the collection, analysis, and  
160 interpretation of data; in the writing of the report; and in the decision to submit the paper for  
161 publication.

162

163 **RESULTS**

164

165 **Choice of reference genome, sample size, and population diversity all impact number of**

166 **SNPs detected**

167 Three different alignment approaches were undertaken for all sequence types (STs) in each  
168 species, in order to investigate the impact of reference genome relatedness and isolate  
169 diversity. The first was the ‘species alignment’, with all isolates from each species’ four most  
170 common STs aligned to the ‘species reference’ (reference chromosome of the same ST as the  
171 largest ST for that species and show by \* in Table 1). The second alignment for each ST used  
172 only isolates of the given ST, but still used the ‘species reference’, herein referred to as the  
173 ‘outgroup-reference alignment’. The third alignment was the ‘ST alignment’, using only  
174 isolates of any given ST and a reference genome of the same ST. For the most common ST in  
175 each species, the species reference was of the same ST, hence the outgroup-reference and ST  
176 alignments were identical. We chose to focus on ST as a means to triage and group within  
177 species, as it is widely recognised in both the genomic and clinical microbiology fields.

178 Details on the resulting alignments are provided in **Supplementary Table 2**. Phylogenetic  
179 trees, including relative position of the reference and population structure, are shown in

180 **Supplementary Figures 1-4.**

181

182 Independent of species, 11/16 ST-grouped analyses showed significant differences in  
183 distribution of pairwise SNPs distances when comparing the different alignment approaches  
184 (**Table 2, Figure 1**), indicating that reference genome selection is critical for robust pairwise  
185 SNP comparisons. *Enterococcus faecium* ST80 and *K. pneumoniae* ST17 were exceptions,  
186 both showing no significant difference between the outgroup-reference alignment and the ST  
187 alignment, likely explained by high intra-ST diversity compared to others. *E. faecium* ST80



188 forms numerous clusters throughout the species phylogeny and *K. pneumoniae* ST17 shows  
189 much deeper branching and genetic distance than other STs in the tree (**Supplementary**  
190 **Figures 2, 3**).

191

192 These analyses demonstrate that, for the majority of species/STs tested, where less genomic  
193 diversity is present, the various approaches generate consistently different pairwise SNPs  
194 distances. In particular, resolution is lost when using a distant reference resulting in a smaller  
195 core alignment and typically higher numbers of pairwise SNP distances; truly closely related  
196 isolate pairs may be misclassified as unlikely transmission. In contrast, for highly diverse STs,  
197 it can make little difference whether a close or distant reference genome is used.

198

### 199 **Effects of masking prophage and recombination regions**

200 Having established that the ST alignments are generally better for fine-scale analyses, these  
201 were used to test the effect of masking regions of horizontal gene transfer. Previous studies  
202 have suggested that these regions result in elevated SNP counts meaning that inferred  
203 phylogenies do not represent the vertical evolution of the population, which may interfere  
204 with identifying transmission through evolution<sup>20-23</sup>. Regions predicted to be prophage  
205 and/or homologous recombination were masked and the resulting pairwise SNP distances  
206 compared to those without masking (**Figure 2**).

207

208 Across all species, masking prophage regions had little-to-no effect on the core alignment,  
209 the core SNP alignment, or pairwise SNP distances (**Figure 2, Supplementary Table 3**).  
210 Prophage regions often coincided with regions that were already excluded from analysis as  
211 they did not form part of the core genome (as shown in **Supplementary Figures 5-8**).

212

213 In contrast, recombination masking showed considerable effects, though the effect size  
214 differed amongst the various species and STs (**Figure 2, Supplementary Table 3**). The  
215 largest differences were among multiple *E. faecium* and *E. coli* STs and *K. pneumoniae* ST17,  
216 where recombination masking saw many isolates' pairwise SNP distances fall by hundreds or  
217 even thousands of SNPs. The extent of effect caused by recombination masking clearly  
218 correlated with the number and size of regions of recombination (**Figure 3**). For example,  
219 some *S. aureus* and *K. pneumoniae* STs (ST5/ST22/ST93 and ST15/ST307/ST323  
220 respectively) each had only a few small recombination regions detected (**Supplementary**  
221 **Figures 5, 7**), and pairwise SNP distances showed minimal changes when this recombination  
222 was omitted (**Figure 2A, 2C**), whereas many of the other STs and species had large areas of  
223 genome removed due to recombination masking. In the most extreme cases, recombination  
224 masking resulted in significant portions of the genome being masked and the average  
225 pairwise SNP distances dropping from many thousands of SNPs to hundreds (*E. faecium*  
226 ST80 [**Supplementary Figure 6A**] and *K. pneumoniae* ST17 [**Supplementary Figure 7B**]).  
227

228 The combined masking of both prophage and recombination showed very similar results to  
229 those seen when masking for only recombination (shown in **Figure 5**); in most species and  
230 STs, predicted regions of recombination included those regions that had been predicted to be  
231 prophage (as seen in **Supplementary Figures 5-8**).

232

233 In cases where isolates are already closely related, masking prophage and/or recombination  
234 makes minimal, if any, difference in pairwise SNP distances meaning that transmission  
235 inference is unaffected. However, isolate pairs that have many pairwise SNP between them,  
236 but which have many of these SNPs masked as regions of recombination, can then  
237 erroneously appear to be closely related and could incorrectly be inferred as likely

238 transmission. In these cases, it would be inappropriate and misleading to mask recombination  
239 when inferring transmission.

240

#### 241 **Effect of cumulative and sliding-window approaches on prospective/real time**

#### 242 **transmission surveillance and inference**

243 Using the ST alignments, and without masking for prophage or recombination, two different  
244 approaches for isolate inclusion and comparison over time were implemented; a cumulative  
245 approach where all additional isolates were included over time, and a three-month sliding-  
246 window approach. In some cases, isolates potentially arising from the same outbreak are  
247 collected over long time periods, and may be important for context and transmission  
248 inference. This has been well described for a number of MDRO outbreaks such as drug-  
249 resistant *K. pneumoniae* where epidemiologically linked samples have been found over years,  
250 in part driven by long-term asymptomatic colonisation<sup>24</sup>. As such, it is important to establish  
251 the potential impact of a continually growing and diversifying dataset, as compared to closed  
252 short-term datasets.

253

254 In the cumulative approach, all new isolates from each sampling month were compared to all  
255 previously included isolates. As the total number of isolates increased over time, so did the  
256 diversity, resulting in a continually diminishing core genome alignment (variant and invariant  
257 sites) (**Figure 4, Supplementary Table 4**). On average, 17.6% (range: 4%-57%) of the  
258 reference genome length was lost from the core alignment from the first to last month of  
259 sampling (**Supplementary Table 2**). *E. coli* ST131 had the greatest loss falling from 91% of  
260 the reference genome in the first sampling month to only 34% in the final month. The core  
261 SNP alignment in most STs increased over time; although the core genome was shrinking,  
262 more of the core sites became variant (i.e. SNPs) (**Figure 4, Supplementary Table 4**).

263 *E. coli* ST131 was an exception, with a steady decrease detected in both the core genome and  
264 core SNP alignments (**Figure 4**).

265

266 The sliding-window approach utilised a three-month window, ‘sliding’ forwards by a single  
267 month each time. In this approach, although there were fluctuations in the proportion of the  
268 reference in the core genome alignment over time, it did not continually decrease as with the  
269 cumulative approach (**Supplementary Table 5**). The mean core alignment size was  
270 consistently higher; more potentially informative sites are present at each time point,  
271 providing finer resolution. For example, while the proportion of the reference genome in the  
272 core alignment for *E. coli* ST131 was reduced to an average 48% and minimum of 34% in the  
273 cumulative approach, the sliding-window approach had an average of 68% and minimum of  
274 50%. In providing much larger and more consistently sized core alignments, the proportion of  
275 reference genome represented in the core alignment, it is also easier to compare pairwise SNP  
276 distances over time.

277

#### 278 **Effect of different approaches on ruling likely or unlikely transmission when applying a** 279 **SNP distance threshold**

280 Although a SNP threshold is commonly applied to infer likely transmission, the choice of  
281 genomic analysis methods has a large influence in calculating the pairwise SNP distances and  
282 therefore which isolate pairs fall below the set threshold. Here, we applied SNP thresholds  
283 ( $\leq 15$  SNPs for *S. aureus* and  $\leq 25$  SNPs for the other species) to rule isolates as “likely” or  
284 “unlikely” putative transmission events for every approach used in this study. We calculated  
285 the overall proportion of isolate pairs that fell below the species’ SNP thresholds for likely  
286 transmission, and importantly also identified how many pairs were above the SNP threshold

287 for likely transmission in one, or more, of the alignment approaches, but ‘shifted’ below the  
288 threshold in another.

289

290 When assessing the effect of isolate and reference genome diversity we found that the out-  
291 group reference approach provided the lowest number of likely transmission pairs compared  
292 to both the species and ST alignments (**Supplementary Table 2, Figure 6**). None of the pairs  
293 that experienced a shift below the SNP threshold did so as a result of the outgroup-reference  
294 analysis, with the exception of the *E. faecium* ST1424 (**Table 3**). The same was calculated  
295 for comparing absence of masking of prophage and/or recombination regions, to the  
296 unmasked alignment (details in **Figure 6, Supplementary Table 3**). Again, we calculated the  
297 number of pairs shifting below the threshold following masking of any kind (**Table 4**). In  
298 almost all cases, masking prophage had little effect on reclassifying isolates pairs to below  
299 the SNP thresholds. Conversely, in most species and STs where large amounts of  
300 recombination were detected and masked, the number of pairs shifting below the SNP  
301 threshold increased by hundreds or, in the case of *E. faecium* ST1421 and *E. coli*. ST131, by  
302 thousands. Finally, we considered the effect of the cumulative and sliding-window  
303 approaches to sample inclusion (**Figure 6, Supplementary Tables, 5**). We identified any  
304 ‘shift’ below the SNP threshold observed between the first and last observation of each pair  
305 compared  $\geq 2$  times (**Table 5**).

306 **DISCUSSION**

307 Prospective WGS of hospital MDROs will enhance real-time transmission identification,  
308 leading to optimised infection prevention and control and limiting further spread, however  
309 methods need to be standardised. Previous studies are often retrospective and *ad hoc*,  
310 frequently tailored to a specific, narrow dataset, such as closely related isolates from a single  
311 pathogen sequence type or a rare AMR phenotype<sup>18,24-26</sup>. This is not the reality of  
312 prospective hospital or jurisdictional wide surveillance where multiple pathogens and  
313 sequence types are detected over time<sup>27</sup>. As such the results, methods, and thresholds that  
314 have been used are not necessarily broadly applicable for prospective surveillance where the  
315 dataset continues to expand over time. Here, we utilised a multi-institutional MDRO dataset  
316 to systematically investigate a range of approaches on the outcome of potential transmission  
317 analyses, providing recommendations for future implementation (**Figure 7**).

318

319 Using a more distant reference genome inflates pairwise SNPs distances, increases ancestral  
320 SNPs, and decreases the number of SNPs that have arisen more recently, hence losing the  
321 fine-scale resolution required for transmission inference. Although pairwise SNP inflation is  
322 lessened when isolates from multiple STs - representing greater genetic diversity and  
323 therefore reducing the core genome - are included, this still fails to replicate the pairwise SNP  
324 distances seen when using a closer reference. This is generally consistent with previous work  
325<sup>28</sup>, though for some STs with high genetic diversity and multiple distinct clusters in the  
326 phylogenies, it appears to make little difference whether an outgroup reference genome or  
327 one of the same ST is used. Given the increased core genome size and fine-scale resolution  
328 among more closely related isolate pairs offered when using a closely related reference  
329 genome, we recommend doing this wherever possible, though the increased accuracy  
330 provided by doing this will be reduced when isolates are highly diverse (**Figure 7, panel A**).

331

332 Prophage masking had little effect in this dataset primarily due to the fact that the prophage  
333 sites corresponded to regions that were already absent from the core genome alignment. In  
334 datasets where this is not the case the effect may change but should be assessed. Masking  
335 recombination had varying effects, heavily dependent on the individual ST datasets. In cases  
336 where isolates were closely related prior to masking, there was little effect, with the opposite  
337 seen in more diverse STs. The number and size of recombination regions, as well as the  
338 extent of the effect of masking, should be carefully considered; a pair of isolates that have a  
339 small number of SNPs after masking but had a hundred regions masked spanning thousands  
340 of SNPs, should not be considered as closely related as a pair that had a small number of  
341 pairwise SNPs both before and after masking. Masking of prophage and recombination  
342 should therefore not be routinely applied for the species discussed here; the former appears to  
343 have minimal effects but increases time and effort required, and the latter has the potential to  
344 inappropriately reduce the number of SNPs between truly distant isolates (**Figure 7, panel B**).  
345 Exceptions may occur when prophage regions are conserved across all isolates or when  
346 recombination is limited to a few large regions.

347

348 Finally, determining putative transmission often revolves around ruling isolates ‘in’ or ‘out’  
349 of a particular genomic cluster, based on set genomic thresholds and supported by  
350 epidemiological analyses. In a truly real-time dataset, new isolates will be continually added  
351 over time. The four species in this study can all reside as asymptomatic commensal  
352 organisms and can remain undetected for a long time, unless carriage-screening is undertaken,  
353 and during this time can undergo diversifying evolution within the host. Given the shrinking  
354 core genome and core SNPs, it is also possible that isolate pairs that are distantly related at an  
355 initial time point may lose much of that measurable genetic distance by the final timepoint

356 **(Figure 7, panel C2)**. This presents at least two serious issues in determining genetic  
357 relatedness. If using a threshold to rule transmission in or out, this isolate pair would be  
358 initially ruled out and subsequently ruled in as putative transmission. Scaling the SNP  
359 numbers proportionate to the amount of core genome or to the entire reference genome may  
360 lessen these effects, but if the parts that are lost from the core over time are the more diverse,  
361 these scaled or adjusted numbers will still fall short of the true diversity. Though many of  
362 these problems are true of the cumulative approach to sample inclusion, they are minimised  
363 when using a sliding-window approach. Core genome and SNP alignments, and relative  
364 pairwise SNP distances, remain more stable over time, making it easier to standardise or  
365 draw comparisons between isolate pairs over time. This approach is also less computationally  
366 intensive, given the smaller number of isolates at each time point. It should be noted that it is  
367 possible that links between closely related isolates may be missed with the sliding-window  
368 approach, if genetically close isolates are temporally more distant. However, using  
369 approaches such as single-linkage methods (to identify relatedness between windows) may be  
370 used to remedy this, in order to highlight ongoing or persistent transmission chains. For  
371 example in time period one, isolates 'A' and 'B' are closely related and in time period two,  
372 isolates 'B' and 'C' are closely related in the second time period, although isolate 'A' is not  
373 within time period two we can infer that although separated by time, 'A' is related to 'C'  
374 through 'B'.

375

376 Ultimately, in the context of determining putative transmission it is likely that a SNP  
377 threshold will be implemented to rule isolates 'in' or 'out' on transmission events. However,  
378 whilst the threshold may be set, we have demonstrated changes in analysis or the addition of  
379 isolates time can see isolate pairs shifting from above the SNP threshold, and therefore ruled  
380 'out', to below the threshold and subsequently ruled 'in'. The most dramatic influence here,



381 in terms number of whether a given pair sat above or below the threshold, were when  
382 masking regions of recombination, followed by using more or less distant reference genomes  
383 and more diverse (multi-ST) datasets in the alignment. Interestingly, despite the shrinking  
384 core alignments observed over time in the cumulative isolate inclusion approach, compared  
385 to the sliding-window approach, we saw relatively small numbers of isolates switching from  
386 above to below the SNP threshold. However, a larger influence was seen among the more  
387 genetically diverse STs (*E. faecium* ST1421 and the *E. coli* ST131).

388

389 In summation, when implementing WGS for transmission surveillance of common MDROs  
390 we recommend using a closely related genome, without masking of prophage or  
391 recombination regions, and a sliding-window approach (**Figure 7**). These all contribute to  
392 maximising the SNP distance resolution and stability in an evolving, real-time dataset, and  
393 these findings help fill the knowledge gap that has hindered the effective implementation of  
394 real-time genomic MDRO surveillance in clinical settings.

395

396

## 397 **LIST OF ABBREVIATIONS**

398

399 AMR – Antimicrobial resistant

400 ESBL – Extended-spectrum beta-lactamase

401 Mbp / Kbp / bp – Mega-base pair / Kilo-base pair / base pair

402 MDR – Multidrug-resistant

403 MDRO – Multidrug-resistant organism

404 MLST – Multi-locus sequence type

405 SNP(s) – Single nucleotide polymorphism(s)

406 ST – Sequence type

407 WGS – Whole genome sequencing

408 **DECLARATIONS**

409

410 **Ethics approval and consent to participate:** This study was approved by the Melbourne  
411 Health Human Research Ethics Committee (HREC) and endorsed by the corresponding  
412 HREC at each participating site.

413

414 **Consent for publication:** Not applicable

415

416 **Availability of data and materials:** Raw sequence data has been uploaded to the Sequence  
417 Read Archive under BioProject PRJNA565795.

418

419 **Competing interests:** The authors declare that they have no competing interests.

420

421 **Funding:** This work was supported by the Melbourne Genomics Health Alliance (funded by  
422 the State Government of Victoria, Department of Health and Human Services, and the ten  
423 member organizations); an National Health and Medical Research Council (Australia)  
424 Partnership grant (GNT1149991) and individual grants from National Health and Medical  
425 Research Council (Australia) to NLS (GNT1093468), JCK (GNT1008549) and BPH  
426 (GNT1105905).

427

428 **Authors' contributions:** BPH and MLG designed and managed the Controlling Superbugs  
429 Study. BPH, CLG and NS designed this project. CLG conducted all genomic, bioinformatic  
430 and statistical analyses, and produced the manuscript and all accompanying figures and tables.  
431 AGDS was part of the Controlling Superbugs Study Group for the initial project and  
432 provided guidance/insights and proofread/edited the manuscript full. DJI provided ongoing

433 input and discussion and edited the manuscript at various stages. CH helped with quality  
434 control for both sequence and epidemiological data, as well as conducting long read  
435 sequencing and assembly of the *E. faecium* ST1424 reference genome, and proofread/edited  
436 the manuscript. TS wrote a python script/code to calculate which sites in the reference  
437 genome were categorised as core sites, and provided bioinformatic advice. TPS provided  
438 guidance and feedback both during the study and for the final manuscript. JCK was part of  
439 the Controlling Superbugs Study Group for the initial project. NLS was part of the  
440 Controlling Superbugs Study Group for the initial project, helped with data collection and  
441 quality control, provided guidance and input throughout, and edited the manuscript.

442

443 **Acknowledgements:**

444 The authors would like to acknowledge the other members of the Controlling Superbugs  
445 Study Group include Robyn Lee (previously MDU, currently University of Toronto), Rhonda  
446 Stuart (Infectious Diseases, Monash Health; Medicine, Monash University), Tony Korman  
447 (Infectious Diseases and Microbiology, Monash Health; Medicine, Monash University),  
448 Caroline Marshall (VIDS, Melbourne Health; Peter Doherty Institute), Hiu Tat Chan  
449 (Microbiology, Melbourne Health), Maryza Graham (Infectious Diseases and Microbiology,  
450 Monash Health; Medicine, Monash University), Paul Johnson (Infectious Diseases, Austin  
451 Health; Peter Doherty Institute; Medicine, Austin Health), Marcel Leroi (Microbiology,  
452 Austin Health), Caroline Reed (Microbiology, Melbourne Health and Peter MacCallum  
453 Cancer Centre), Michael Richards (VIDS, Melbourne Health; Peter Doherty Institute),  
454 Monica Slavin and Leon Worth (Infectious Diseases, Peter MacCallum Cancer Centre;  
455 National Centre for Infections in Cancer; University of Melbourne), Elizabeth Grabsch  
456 (Microbiology, Austin Health), Joanna Price and Carolyn Tullett (Infection Control, Austin  
457 Health), Despina Kotsanas (Microbiology, Monash Health), Louise Wright (Infection Control,

458 Monash Health), Suraya Hanim Abdullah Hashim and Jennifer Mitchell (Infectious Diseases,  
459 Melbourne Health), Tram Nguyen and Margaret Savanyo (Microbiology, Melbourne Health),  
460 Olivia Smibert and Victoria Madigan (Infectious Diseases, Peter MacCallum Cancer Centre)  
461 and Peter Pham (MDU Public Health Laboratory, University of Melbourne). Additionally,  
462 the authors would like to acknowledge the assistance of the following people: John  
463 Greenough, Jennifer Breen and Penny Birchmore (infection control queries and patient  
464 movement data) and Carol Wedge (data entry).

465     **REFERENCES**

466

- 467     1.     Centres for Disease Control and Prevention US. Antibiotic resistance threats in the  
468           United States, 2013. Centres for Disease Control and Prevention, US Department of  
469           Health and Human Services; 2013.
- 470     2.     World Health Organisation. Antimicrobial resistance: global report on surveillance.  
471           2014 Apr.
- 472     3.     World Health Organisation. Global antimicrobial resistance surveillance system  
473           (GLASS) report. 2019 Jan.
- 474     4.     World Health Organisation. Global action plan on antimicrobial resistance. 2015 May.
- 475     5.     World Health Organisation. Global Antimicrobial Resistance and Use Surveillance  
476           System (GLASS): Whole-genome sequencing for surveillance of antimicrobial  
477           resistance. 2020 Sep.
- 478     6.     Cosgrove SE. The Relationship between Antimicrobial Resistance and Patient  
479           Outcomes: Mortality, Length of Hospital Stay, and Health Care Costs. *Clin Infect Dis.*  
480           2006 Jan 15;42(Supplement\_2):S82–9.
- 481     7.     Schulgen G, Kropec A, Kappstein I, Daschner F, Schumacher M. Estimation of extra  
482           hospital stay attributable to nosocomial infections: heterogeneity and timing of events.  
483           *Journal of Clinical Epidemiology.* 2000;53(4):409–17.
- 484     8.     Arefian H, Hagel S, Heublein S, Rissner F, Scherag A, Brunkhorst FM, et al. Extra  
485           length of stay and costs because of health care–associated infections at a German  
486           university hospital. *Am J Inf Cont.* 2016;44(2):160–6.
- 487     9.     Dramowski A, Whitelaw A, Cotton MF. Burden, spectrum, and impact of healthcare-  
488           associated infection at a South African children's hospital. *J Hosp Infect.*  
489           2016;94(4):364–72.
- 490     10.    Maragakis LL, Perencevich EN, Cosgrove SE. Clinical and economic burden of  
491           antimicrobial resistance. *Expert Rev Anti Infect Ther.* Taylor & Francis; 2014 Jan  
492           10;6(5):751–63.
- 493     11.    Boucher HW, Talbot GH, Bradley JS, Edwards JE, Gilbert D, Rice LB, et al. Bad bugs,  
494           no drugs: no ESKAPE! An update from the Infectious Diseases Society of America.  
495           *Clin Infect Dis.* Oxford University Press; 2009 Jan 1;48(1):1–12.
- 496     12.    Pendleton JN, Gorman SP, Gilmore BF. Clinical relevance of the ESKAPE pathogens.  
497           *Expert Rev Anti Infect Ther.* Taylor & Francis; 2013;11(3):297–308.
- 498     13.    Centres for Disease Control and Prevention US. Antibiotic Resistance Threats in the  
499           United States, 2019. 2019.
- 500     14.    Hendriksen RS, Bortolaia V, Tate H, Tyson GH, Aarestrup FM, McDermott PF. Using  
501           Genomics to Track Global Antimicrobial Resistance. *Front Public Health.* 2019;7:242.

- 502 15. Sherry NL, Lane CR, Kwong JC, Schultz M, Sait M, Stevens K, et al. Genomics for  
503 molecular epidemiology and detecting transmission of carbapenemase-producing  
504 Enterobacterales in Victoria, Australia, 2012 to 2016. *J Clin Microbiol. Am Soc*  
505 *Microbiol*; 2019;57(9):e00573–19.
- 506 16. Gorrie CL, Mirčeta M, Wick RR, Edwards DJ, Thomson NR, Strugnell RA, et al.  
507 Gastrointestinal carriage is a major reservoir of *Klebsiella pneumoniae* infection in  
508 intensive care patients. *Clin Infect Dis*. 2017;65(2):208–15.
- 509 17. Raven KE, Gouliouris T, Brodrick H, Coll F, Brown NM, Reynolds R, et al. Complex  
510 routes of nosocomial vancomycin-resistant *Enterococcus faecium* transmission  
511 revealed by genome sequencing. *Clin Infect Dis*. Oxford University Press US;  
512 2017;64(7):886–93.
- 513 18. Harris SR, Cartwright EJ, Török ME, Holden MT, Brown NM, Ogilvy-Stuart AL, et al.  
514 Whole-genome sequencing for analysis of an outbreak of meticillin-resistant  
515 *Staphylococcus aureus*: a descriptive study. *Lancet Infect Dis*. Elsevier;  
516 2013;13(2):130–6.
- 517 19. Sherry NL, Lee RS, Gorrie CL, Kwong JC, Stuart RL, Korman T, et al. Genomic  
518 interrogation of the burden and transmission of multidrug-resistant pathogens within  
519 and across hospital networks. *bioRxiv*org. 2019 Jan 1;:764787.
- 520 20. Croucher NJ, Page AJ, Connor TR, Delaney AJ, Keane JA, Bentley SD, et al. Rapid  
521 phylogenetic analysis of large samples of recombinant bacterial whole genome  
522 sequences using Gubbins. *Nucleic Acids Res*. 2014 Nov 20;43(3):e15–5.
- 523 21. Schierup MH, Hein J. Consequences of recombination on traditional phylogenetic  
524 analysis. *Genetics*. 2000 Oct 1;156(2):879–91.
- 525 22. Posada D, Crandall KA. The effect of recombination on the accuracy of phylogeny  
526 estimation. *J Mol Evol*. 2002 Mar;54(3):396–402.
- 527 23. Didelot X, Maiden MCJ. Impact of recombination on bacterial evolution. *Trends*  
528 *Microbiol*. 2010;18(7):315–22.
- 529 24. Kwong JC, Lane CR, Romanes F, da Silva AG, Easton M, Cronin K, et al. Translating  
530 genomics into practice for real-time surveillance and response to carbapenemase-  
531 producing Enterobacteriaceae: evidence from a complex multi-institutional KPC  
532 outbreak. *PeerJ*. PeerJ Inc; 2018;6:e4210.
- 533 25. Snitkin E, Zelazny A, Thomas P, Stock F, Henderson D, Palmore T, et al. Tracking a  
534 hospital outbreak of carbapenem-resistant *Klebsiella pneumoniae* with whole-genome  
535 sequencing. *Sci Transl Med*. 2012;4(148):148ra116–6.
- 536 26. Witney AA, Gould KA, Pope CF, Bolt F, Stoker NG, Cubbon MD, et al. Genome  
537 sequencing and characterization of an extensively drug-resistant sequence type 111  
538 serotype O12 hospital outbreak strain of *Pseudomonas aeruginosa*. *Clin Microbiol*  
539 *Infect*. 2014;20(10):O609–18.

- 540 27. Lane CR, Brett J, Schultz M, Gorrie CL, Stevens K, Cameron DR, et al. Search and  
541 Contain: Impact of an Integrated Genomic and Epidemiological Surveillance and  
542 Response Program for Control of Carbapenemase-Producing Enterobacterales. 2020.
- 543 28. Kwong JC, Mercoulia K, Tomita T, Easton M, Li HY, Bulach DM, et al. Prospective  
544 Whole-Genome Sequencing Enhances National Surveillance of *Listeria*  
545 *monocytogenes*. *J Clin Microbiol. American Society for Microbiology*; 2016 Feb  
546 1;54(2):333–42.

547

548

549

550

551

552

553

554

555

556

557

558

559

560

561

562

563

564

565

566

567



568 **Table 1. Summary of species, sequence types, and reference genomes for 1537 genomes included in this**  
 569 **study.**

| Species (n total isolates)                | Sequence Type | Number of isolates | Reference chromosome | Reference chromosome size |
|-------------------------------------------|---------------|--------------------|----------------------|---------------------------|
| <i>Staphylococcus aureus</i><br>(n = 510) | ST5           | 61                 | BPH2819              | 2733461 bp                |
|                                           | ST22*         | 222                | BPH2900*             | 2823339 bp                |
|                                           | ST45          | 158                | NC_021554.1          | 2850503 bp                |
|                                           | ST93          | 69                 | NC_017338.1          | 2811435 bp                |
| <i>Enterococcus faecium</i><br>(n = 305)  | ST80          | 29                 | CP027501             | 2912017 bp                |
|                                           | ST203         | 60                 | CP027517             | 2863087 bp                |
|                                           | ST1421*       | 146                | CP027497*            | 2883877 bp                |
|                                           | ST1424        | 70                 | AUSMDU00011555       | 2946167 bp                |
| <i>Klebsiella pneumoniae</i><br>(n = 62)  | ST15          | 12                 | CP034045             | 5319653 bp                |
|                                           | ST17          | 12                 | CP009461             | 5118878 bp                |
|                                           | ST307*        | 23                 | CP025146*            | 5383248 bp                |
|                                           | ST323         | 15                 | CP024499             | 5234963 bp                |
| <i>Escherichia coli</i><br>(n = 660)      | ST38          | 39                 | CP026723             | 5492922 bp                |
|                                           | ST131*        | 460                | NC_013654.1*         | 4717338 bp                |
|                                           | ST648         | 51                 | CP023258             | 5074278 bp                |
|                                           | ST1193        | 110                | CP030111             | 4939457 bp                |

\* indicates the reference chromosome in both the species-level (multiple-ST) alignment and the outgroup-reference alignment.

570  
571  
572  
573  
574  
575  
576  
577

**Table 2. P-values arising from pairwise Wilcoxon tests for significance between species, outgroup-reference and ST alignments for each ST.**

| Species and ST       | Species vs Outgroup-reference | Species vs ST        | Outgroup-reference vs ST |
|----------------------|-------------------------------|----------------------|--------------------------|
| <i>S. aureus</i>     |                               |                      |                          |
| - ST5                | <math>2^{-16}</math>          | <math>2^{-16}</math> | <math>2^{-16}</math>     |
| - ST22*              | <math>2^{-16}</math>          | <math>2^{-16}</math> | 1                        |
| - ST45               | <math>2^{-16}</math>          | <math>2^{-16}</math> | <math>2^{-16}</math>     |
| - ST93               | <math>2^{-16}</math>          | <math>2^{-16}</math> | <math>2^{-16}</math>     |
| <i>E. faecium</i>    |                               |                      |                          |
| - ST80               | <math>2^{-16}</math>          | <math>2^{-16}</math> | 0.57                     |
| - ST203              | <math>2^{-16}</math>          | <math>2^{-16}</math> | <math>2^{-16}</math>     |
| - ST1421*            | <math>2^{-16}</math>          | <math>2^{-16}</math> | 1                        |
| - ST1424             | <math>2^{-16}</math>          | <math>2^{-16}</math> | <math>2^{-16}</math>     |
| <i>K. pneumoniae</i> |                               |                      |                          |
| - ST15               | 0.0096                        | $5 \cdot 2^{-10}$    | $1 \cdot 0^{-14}$        |
| - ST17               | 0.096                         | 0.399                | 0.264                    |
| - ST307*             | <math>2^{-16}</math>          | <math>2^{-16}</math> | 1                        |
| - ST323              | 0.0026                        | $2 \cdot 4^{-13}$    | <math>2^{-16}</math>     |
| <i>E. coli</i>       |                               |                      |                          |
| - ST38               | <math>2^{-16}</math>          | <math>2^{-16}</math> | <math>2^{-16}</math>     |
| - ST131*             | <math>2^{-16}</math>          | <math>2^{-16}</math> | 1                        |
| - ST648              | <math>2^{-16}</math>          | <math>2^{-16}</math> | <math>2^{-16}</math>     |
| - ST1193             | <math>2^{-16}</math>          | <math>2^{-16}</math> | <math>2^{-16}</math>     |

\* indicates the ST of the reference genome used in the species and outgroup-reference alignments, in the case of these STs the outgroup-reference alignment was the same as the ST alignments. Significance determined for  $p < 0.05$ .

578  
579  
580

581 **Table 3. Isolate pairs variably below SNP threshold with the three analysis approaches.** Total number of  
 582 pairs that are variably below the threshold for some, but not all, of the analysis approaches, shown for each  
 583 species and ST, as well as the number of those pairs that experience a shift, that are below the SNP threshold in  
 584 each of the analysis.

| Species and ST<br>(total isolate pairs) | Total variable pairs | Number of variable pairs below SNP threshold for each analysis |          |     |
|-----------------------------------------|----------------------|----------------------------------------------------------------|----------|-----|
|                                         |                      | Species                                                        | Outgroup | ST  |
| <i>S. aureus</i>                        |                      |                                                                |          |     |
| - ST5                                   | 16                   | 13                                                             | 0        | 16  |
| - ST22*                                 | 40                   | 40                                                             | 0        | 0   |
| - ST45                                  | 24                   | 3                                                              | 0        | 24  |
| - ST93                                  | 40                   | 2                                                              | 0        | 40  |
| <i>E. faecium</i>                       |                      |                                                                |          |     |
| - ST80                                  | 30                   | 30                                                             | 0        | 19  |
| - ST203                                 | 785                  | 466                                                            | 0        | 720 |
| - ST1421*                               | 169                  | 169                                                            | 0        | 0   |
| - ST1424                                | 670                  | 670                                                            | 120      | 0   |
| <i>K. pneumoniae</i>                    |                      |                                                                |          |     |
| - ST15                                  | 7                    | 0                                                              | 0        | 7   |
| - ST17                                  | 1                    | 0                                                              | 0        | 1   |
| - ST307*                                | 3                    | 3                                                              | 0        | 0   |
| - ST323                                 | 66                   | 0                                                              | 0        | 66  |
| <i>E. coli</i>                          |                      |                                                                |          |     |
| - ST38                                  | 1                    | 0                                                              | 0        | 1   |
| - ST131*                                | 3678                 | 3678                                                           | 0        | 0   |
| - ST648                                 | 4                    | 4                                                              | 0        | 3   |
| - ST1193                                | 425                  | 286                                                            | 0        | 179 |

\* indicates the sequence of the reference genome used for the species and outgroup analyses.

585  
 586  
 587  
 588  
 589

590 **Table 4. Isolate pairs variably below SNP threshold with one or more of the masking approaches.** Total  
 591 number of pairs that are above the SNP threshold without masking but that shift below the threshold with one or  
 592 more masking approaches, shown for each species and ST. The final four columns show the number of these  
 593 variable pairs that fall below the SNP thresholds for each masking approach.

| Species and ST       | Total variable pairs | Number of variable pairs that are below SNP threshold, with each masking approach |       |         |       |
|----------------------|----------------------|-----------------------------------------------------------------------------------|-------|---------|-------|
|                      |                      | None                                                                              | Phage | Recomb. | Both  |
| <i>S. aureus</i>     |                      |                                                                                   |       |         |       |
| - ST5                | 0                    | -                                                                                 | -     | -       | -     |
| - ST22               | 1                    | 0                                                                                 | 1     | 0       | 1     |
| - ST45               | 72                   | 0                                                                                 | 0     | 72      | 72    |
| - ST93               | 0                    | -                                                                                 | -     | -       | -     |
| <i>E. faecium</i>    |                      |                                                                                   |       |         |       |
| - ST80               | 15                   | 0                                                                                 | 0     | 15      | 5     |
| - ST203              | 187                  | 0                                                                                 | 0     | 187     | 187   |
| - ST1421             | 3879                 | 0                                                                                 | 0     | 3879    | 3879  |
| - ST1424             | 870                  | 0                                                                                 | 0     | 870     | 870   |
| <i>K. pneumoniae</i> |                      |                                                                                   |       |         |       |
| - ST15               | 0                    | -                                                                                 | -     | -       | -     |
| - ST17               | 7                    | 0                                                                                 | 0     | 7       | 7     |
| - ST307              | 0                    | -                                                                                 | -     | -       | -     |
| - ST323              | 0                    | -                                                                                 | -     | -       | -     |
| <i>E. coli</i>       |                      |                                                                                   |       |         |       |
| - ST38               | 2                    | 0                                                                                 | 0     | 2       | 2     |
| - ST131              | 22339                | 0                                                                                 | 49    | 22083   | 22339 |
| - ST648              | 9                    | 0                                                                                 | 0     | 9       | 9     |
| - ST1193             | 75                   | 0                                                                                 | 11    | 66      | 75    |

594 Phage; masking of prophage regions. Recomb; masking of recombination regions.

595 **Table 5. Isolate pairs variably below SNP threshold with either of the isolate inclusion approaches.** Total  
 596 number of variable pairs is shown for each species and ST. In the cumulative approach when a shift below the  
 597 threshold occurred it was also a shift downwards over time. In the sliding-window approach, the shift could  
 598 either move from above to below the threshold, or the reverse.

| Species and ST       | Cumulative approach             |                                                                  | Sliding-window approach         |                                                                  |
|----------------------|---------------------------------|------------------------------------------------------------------|---------------------------------|------------------------------------------------------------------|
|                      | Total pairs seen $\geq 2$ times | Pairs seen $\geq 2$ times, that are variably below SNP threshold | Total pairs seen $\geq 2$ times | Pairs seen $\geq 2$ times, that are variably below SNP threshold |
| <i>S. aureus</i>     |                                 |                                                                  |                                 |                                                                  |
| - ST5                | 1711                            | 0                                                                | 328                             | 0                                                                |
| - ST22               | 21736                           | 6                                                                | 3528                            | 0                                                                |
| - ST45               | 11175                           | 8                                                                | 2064                            | 1                                                                |
| - ST93               | 1170                            | 0                                                                | 276                             | 0                                                                |
| <i>E. faecium</i>    |                                 |                                                                  |                                 |                                                                  |
| - ST80               | 325                             | 1                                                                | 25                              | 1                                                                |
| - ST203              | 1596                            | 9                                                                | 142                             | 0                                                                |
| - ST1421             | 9730                            | 59                                                               | 944                             | 23                                                               |
| - ST1424             | 1128                            | 17                                                               | 298                             | 4                                                                |
| <i>K. pneumoniae</i> |                                 |                                                                  |                                 |                                                                  |
| - ST15               | 66                              | 0                                                                | 9                               | 1                                                                |
| - ST17               | 66                              | 0                                                                | 9                               | 0                                                                |
| - ST307              | 253                             | 0                                                                | 23                              | 0                                                                |
| - ST323              | 91                              | 0                                                                | 9                               | 0                                                                |
| <i>E. coli</i>       |                                 |                                                                  |                                 |                                                                  |
| - ST38               | 630                             | 0                                                                | 55                              | 0                                                                |
| - ST131              | 88831                           | 223                                                              | 12872                           | 2                                                                |
| - ST648              | 1035                            | 0                                                                | 140                             | 0                                                                |
| - ST1193             | 5151                            | 16                                                               | 857                             | 2                                                                |

599

600

601

602

603

604

605

606

607

608

609

610 **FIGURE LEGENDS**

611 **Figure 1. Distribution of single nucleotide polymorphism (SNP) distances between**  
612 **isolate pairs of the same sequence type, from three different reference-alignment**  
613 **combinations.** Pairwise SNP distances are shown on log<sub>10</sub> scale on the y-axis; maximum y-  
614 axis values differ by species. The three reference-alignment comparisons are shown on the x-  
615 axis. ‘Species’ shows pairwise SNP distances drawn from an alignment of isolates from four  
616 different STs against the species reference genome, as per **Table 1**. This same reference  
617 genome is used as an outgroup-reference, shown here under ‘Outgroup’, but all isolates are of  
618 a single ST. ‘ST’ uses both isolates and reference genome of the same ST. All boxplots are  
619 coloured according to ST.

620

621 **Figure 2. Distribution of single nucleotide polymorphism (SNP) distances between**  
622 **isolate pairs of the same sequence type, before and after masking regions of phage,**  
623 **recombination, or both (phage and recombination).** Pairwise SNP distances are shown on  
624 log<sub>10</sub> scale on the y-axis; maximum y-axis values differ by species. Sequence type (ST) are  
625 shown on the x-axis, and boxplots are also coloured by ST.

626

627 **Figure 3. Distribution of predicted phage and recombination region sizes.** The size of the  
628 region (in base pairs [bp]) is shown on a log<sub>10</sub> scale on the y-axis; maximum y-axis values  
629 differ by species. The type of region, either phage or recombination, is shown on the x-axis.  
630 Boxplots are colour by sequence type (ST).

631

632 **Figure 4. Effects of cumulative inclusion of all isolates over time, calculated at the**  
633 **conclusion of each calendar month. Panel A:** the total number of isolates collected and  
634 included in the alignment and analysis. **Panel B:** the proportion of the reference chromosome  
635 that is represented in the core genome alignment (both variant [including SNPs] and invariant  
636 sites) as a percentage of the full reference chromosome length. **Panel C:** the length of the  
637 core SNP alignment, shown on the y-axis in kilobase pairs (Kbp). All plots are coloured by  
638 sequence type (ST).

639

640 **Figure 5. Effects of sliding-window inclusion of isolates over time, calculated at the**  
641 **conclusion of each three-month window. Panel A:** the total number of isolates collected  
642 and included in the alignment and analysis. **Panel B:** the proportion of the reference  
643 chromosome that is represented in the core genome alignment (both variant [including SNPs]  
644 and invariant sites) as a percentage of the full reference chromosome length. **Panel C:** the  
645 length of the core SNP alignment, shown on the y-axis in kilobase pairs (Kbp). All plots are  
646 coloured by sequence type (ST).

647

648 **Figure 6. Effects of analysis level, masking of phage and/or recombination regions, and**  
649 **different approaches to sample inclusion of time, on proportion of isolate pairs falling**  
650 **under the SNP threshold for putative transmission.** The y-axis shows the percentage of  
651 isolates pairs under the SNP threshold for putative transmission for each species; for  
652 *S. aureus* (**Panel A**) the threshold is  $\leq 15$  SNPs, for all other species (**Panel B-D**) the  
653 threshold is  $\leq 25$  SNPs. The y-axis maximum value differs by species but is consistent across  
654 all plots for the species. All plots are coloured by sequence type (ST).

655

656 **Figure 7. Framework recommendation and justification for pathogen-specific**  
657 **standardisation for MDRO surveillance using genomics.** Panel A shows the percentage of  
658 the reference genome that is represented in the core genome for each Species (A1) and ST  
659 (A2), with each of the three different alignment approaches (shown on the x-axis). Panel B  
660 shows the percentage of the reference genome that is represented in the core genome for each  
661 ST (B1), with each of the three main approaches to masking regions of horizontal gene  
662 transfer (ie. no masking, masking of prophage, and masking of recombination regions; shown  
663 on the x-axis). Panel B2 shows the distribution of pairwise SNP distances between all isolate  
664 pairs, grouped by Species, without any masking and with masking of recombination regions.  
665 Panel C1 shows the median difference between the initial pairwise SNP distances, for all  
666 pairs compared in both the cumulative and sliding window approaches that had changing  
667 SNP distances observed over time, calculated by subtracting each initial sliding window  
668 pairwise SNP distance from each initial cumulative pairwise SNP distance; all values here are  
669 less than zero indicating the median initial cumulative pairwise SNP distance is always less  
670 than the median initial sliding window pairwise SNP distance. Panel C2 shows the median  
671 difference (ie. increase or decrease) between the initial and final pairwise SNP distances, for  
672 all pairs compared at least twice, for both the cumulative and sliding window approaches; a  
673 negative value shows a median decrease in pairwise SNP distances and therefore a loss of  
674 genetic resolution over time as the dataset changes or grows, a positive value shows the  
675 opposite. Points and plots are coloured by Species and ST, according to the legend, dotted  
676 lines are used (in panels A1, A2, B1) for ease of visualising the relationship between discrete  
677 approach variables.

678

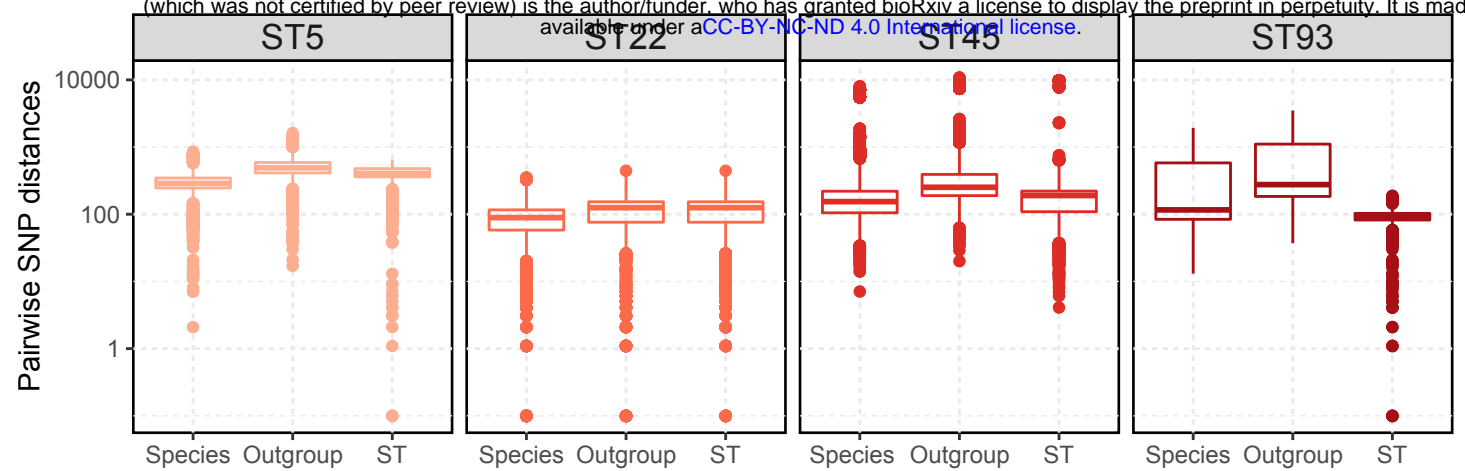

B. *E. faecium*, pairwise SNP distances between isolates of the same ST

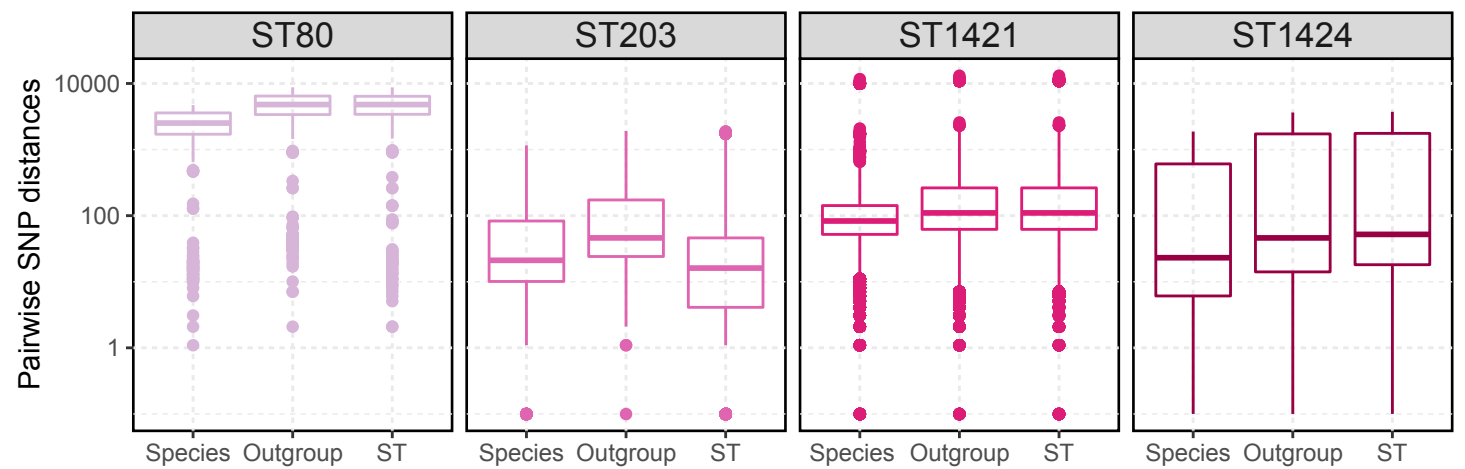

C. *K. pneumoniae*, pairwise SNP distances between isolates of the same ST

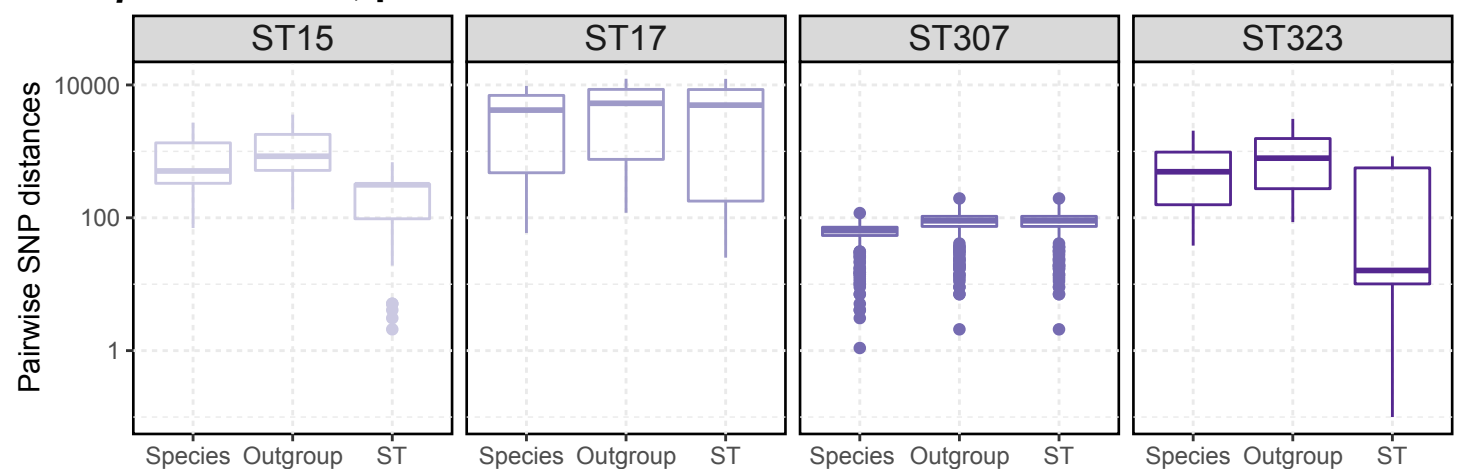

D. *E. coli*, pairwise SNP distances between isolates of the same ST

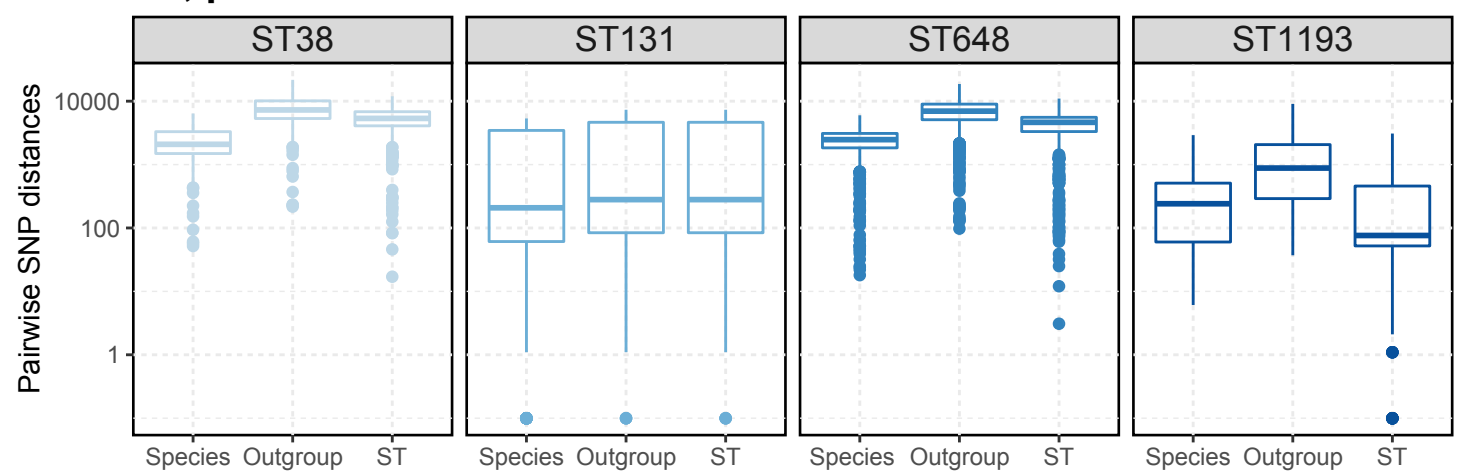

**A. *S. aureus*, with/without phage/recombination masking**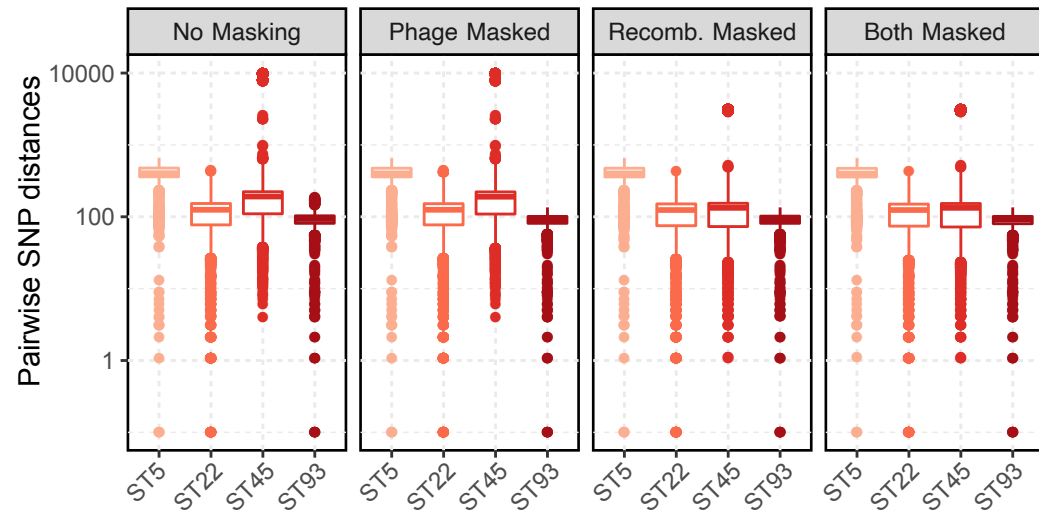**B. *E. faecium*, with/without phage/recombination masking**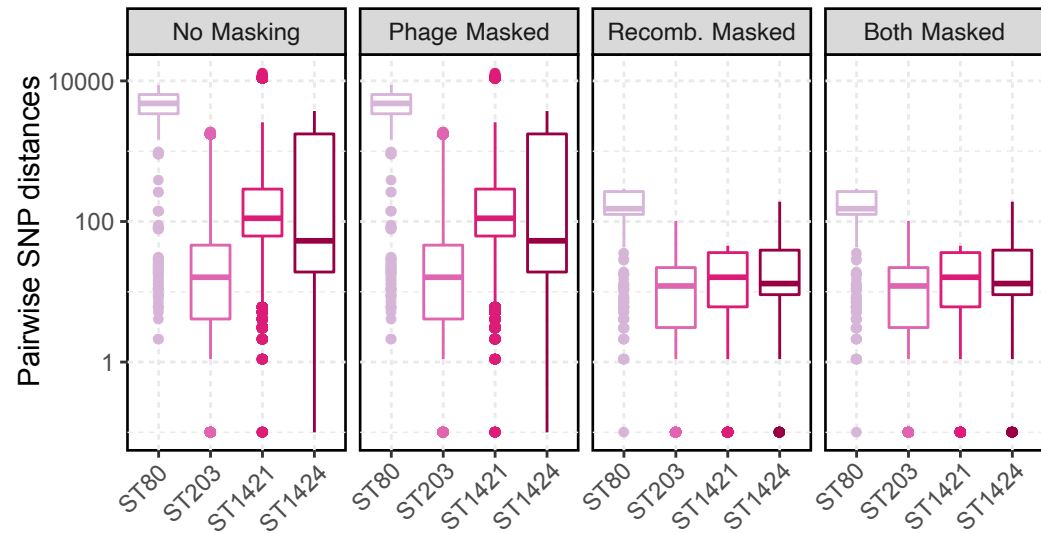**C. *K. pneumoniae*, with/without phage/recombination masking**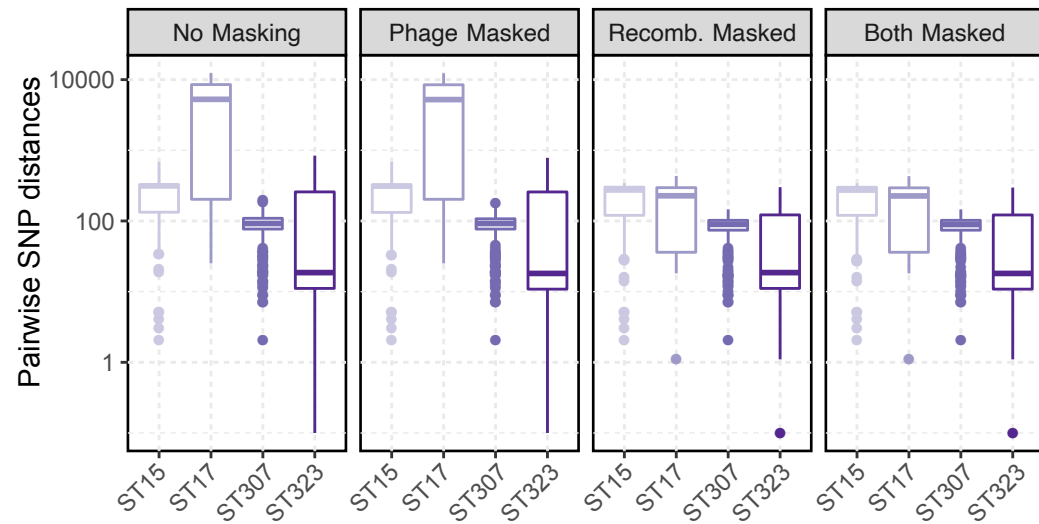**D. *E. coli*, with/without phage/recombination masking**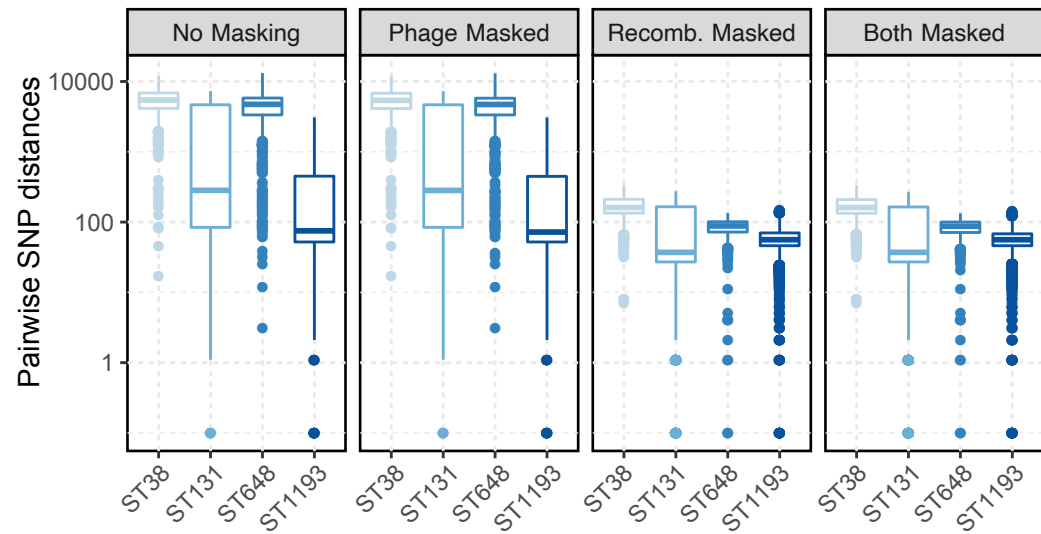



### A. *S. aureus*, distribution of sizes of phage/recombination regions

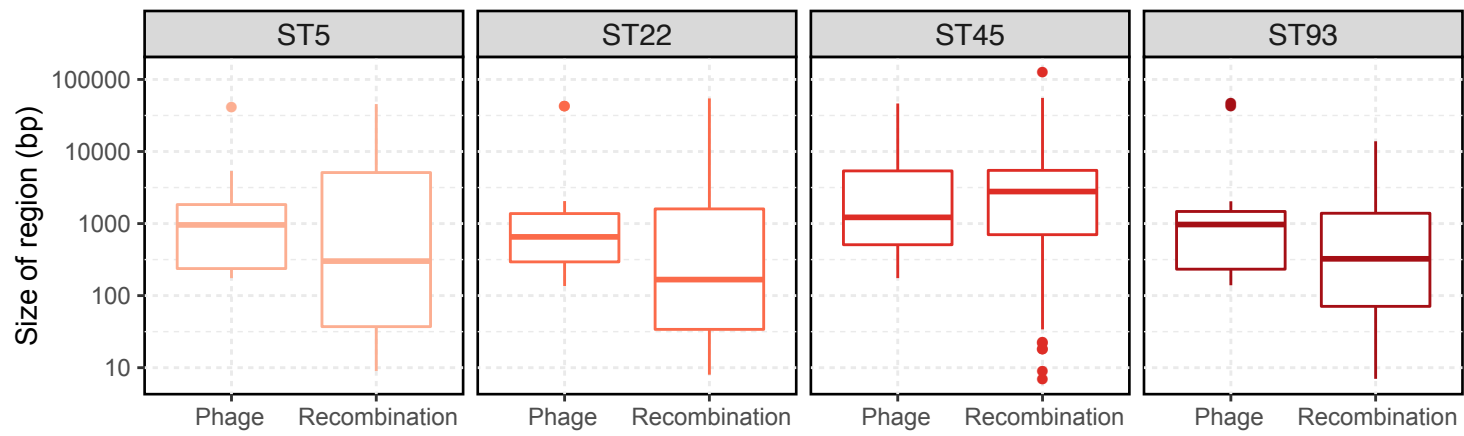

### B. *E. faecium*, distribution of sizes of phage/recombination regions

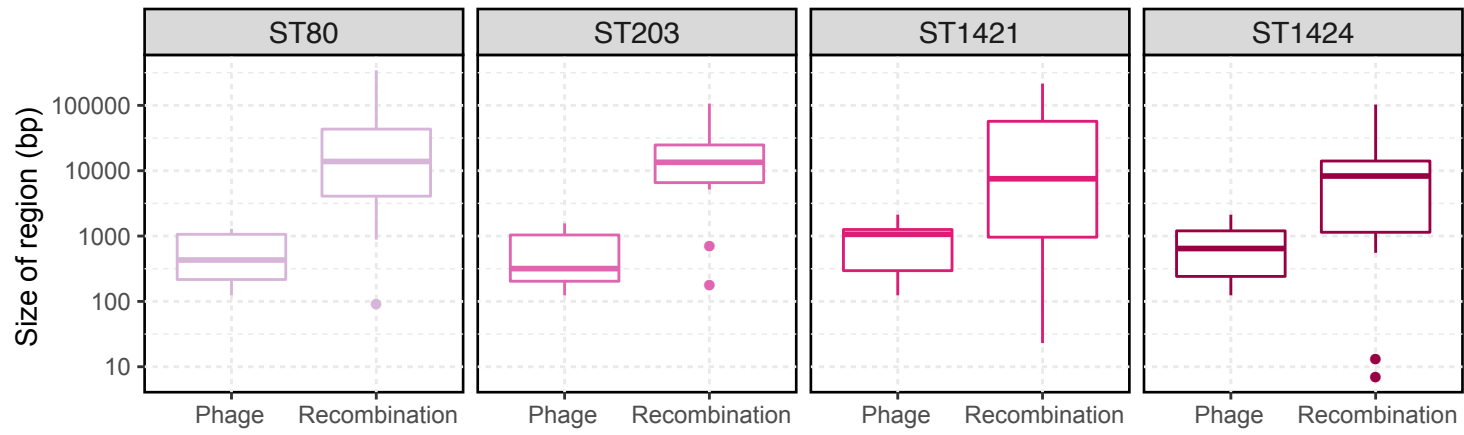

### C. *K. pneumoniae*, distribution of sizes of phage/recombination regions

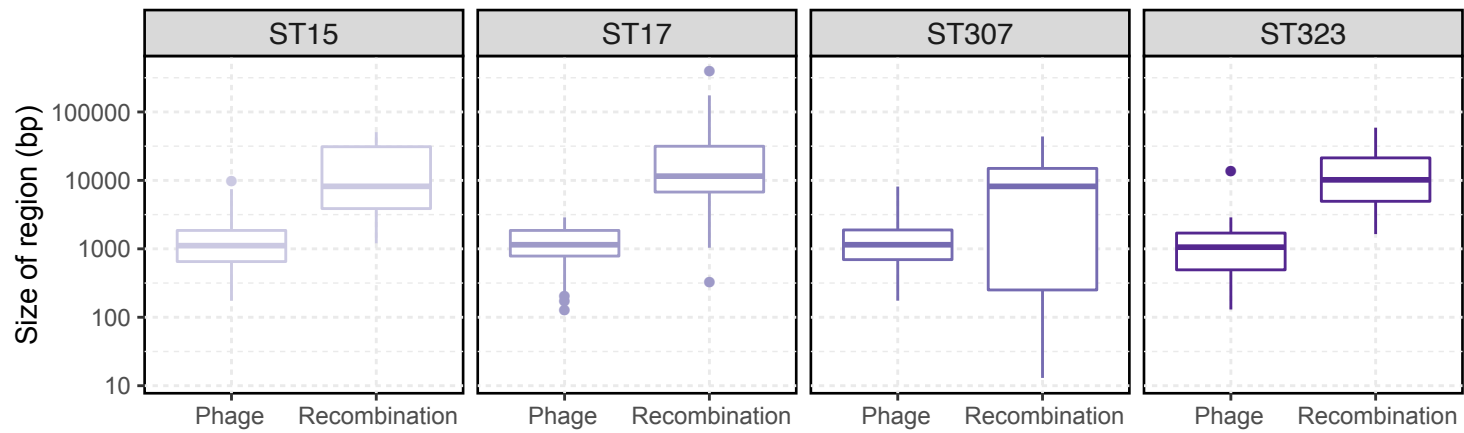

### D. *E. coli*, distribution of sizes of phage/recombination regions

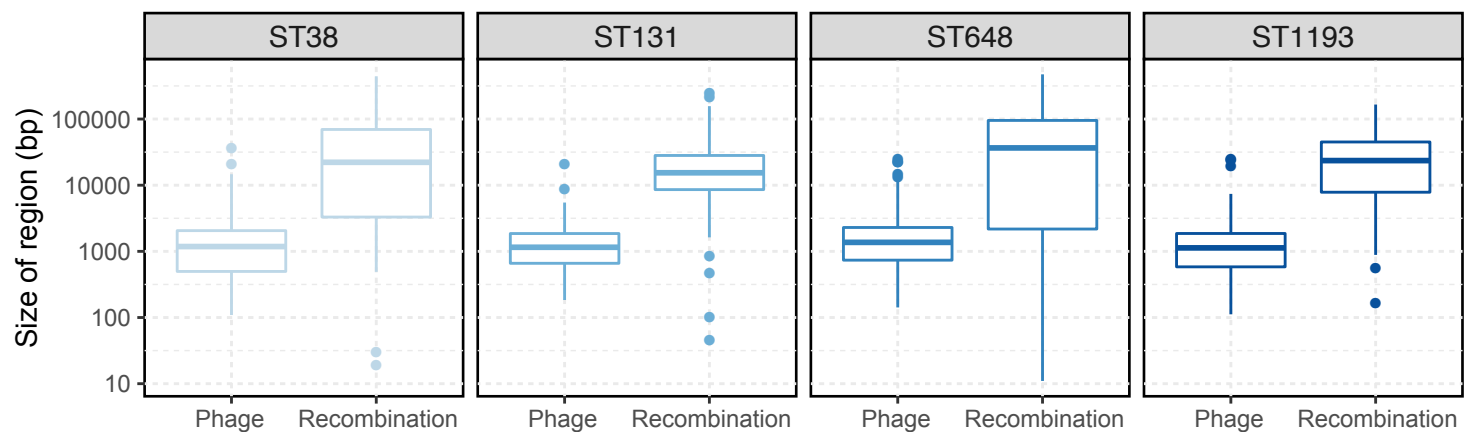

**A. Number of isolates in alignment**

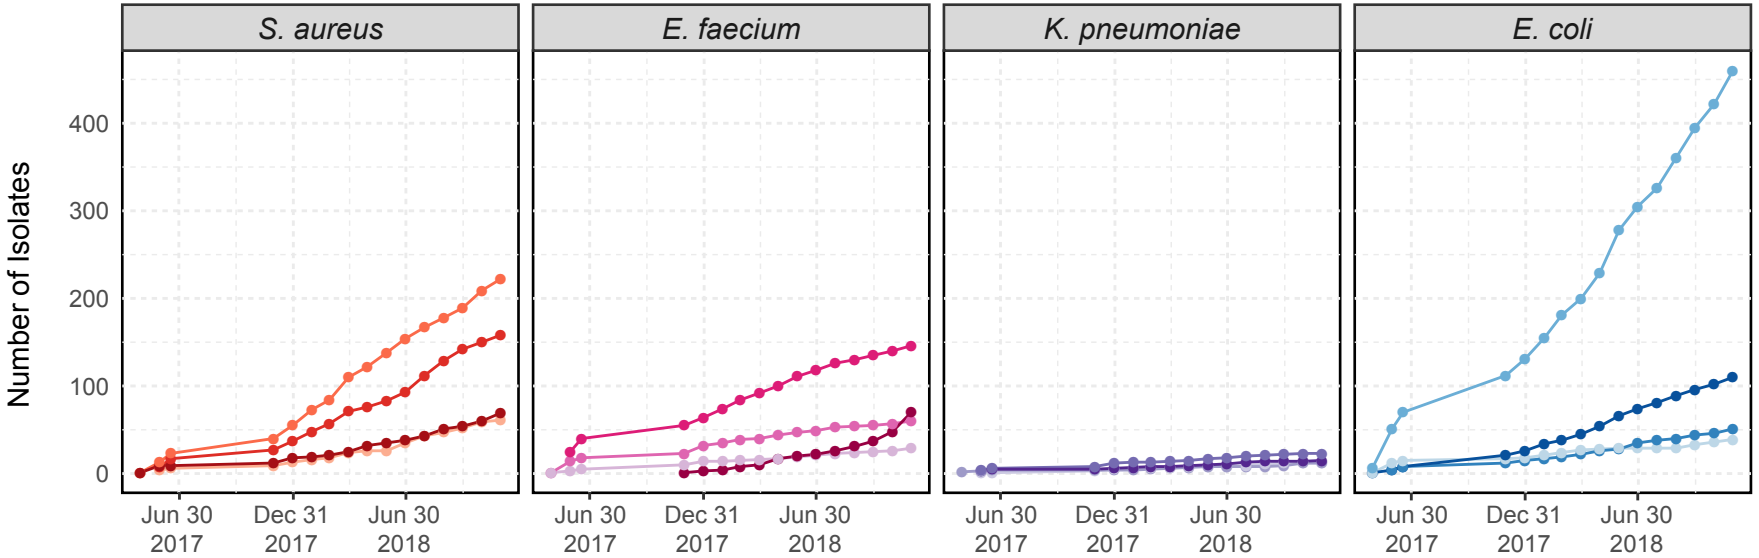

**B. Percentage of reference chromosome represented in core genome alignment**

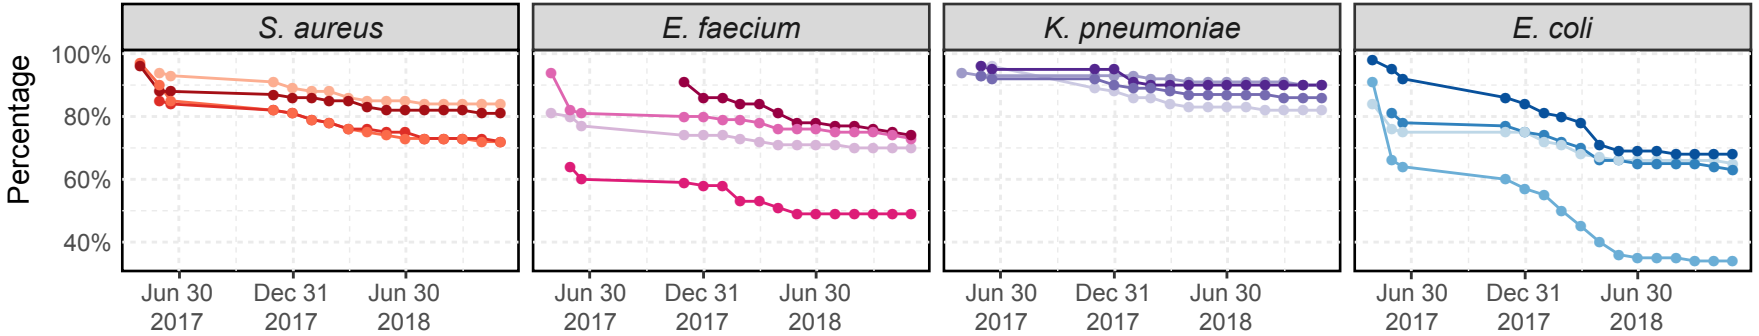

**C. Length of core SNP alignment**

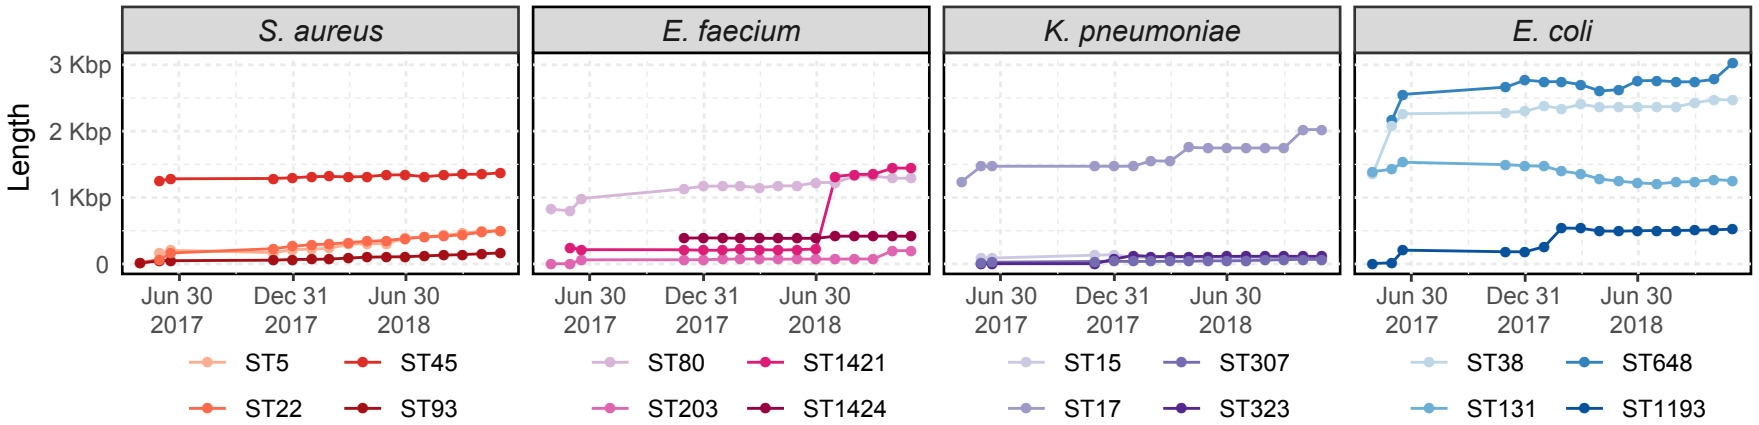

## A. Number of isolates in alignment

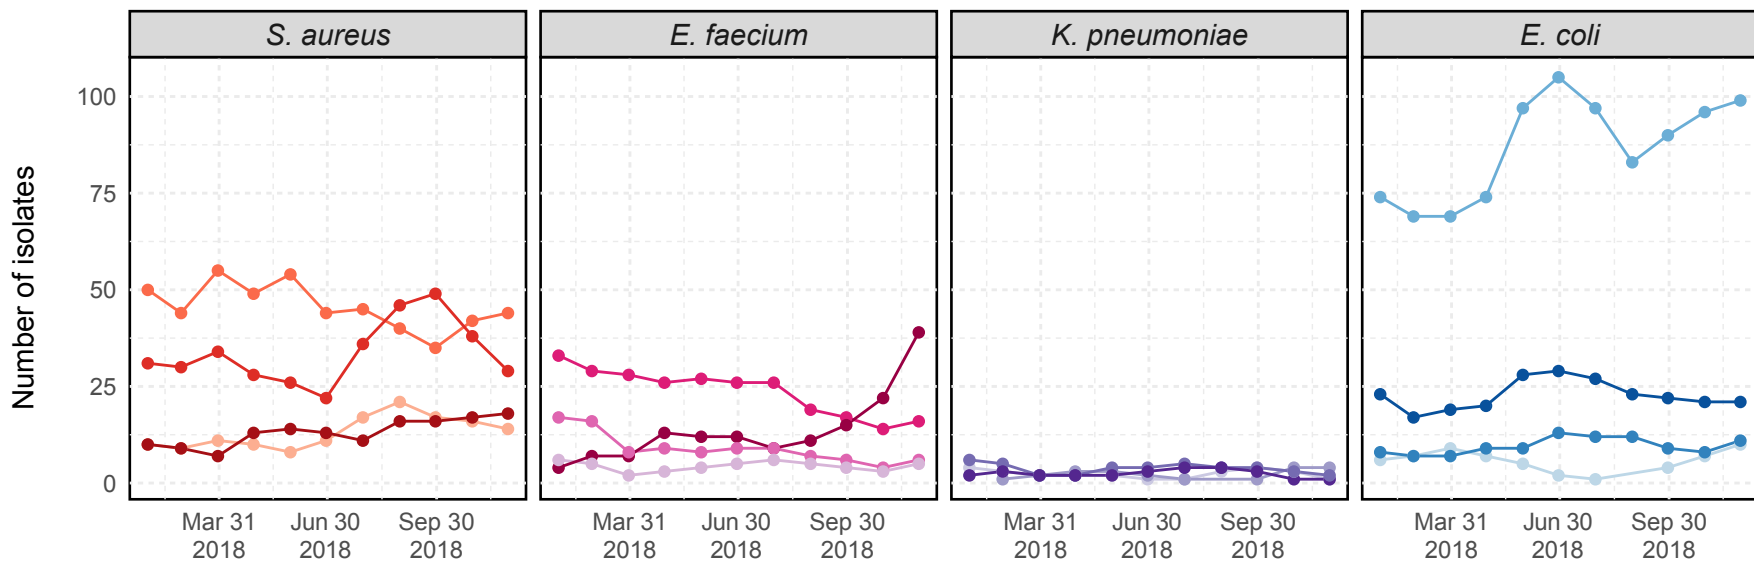

## B. Percentage of reference chromosome represented in core alignment

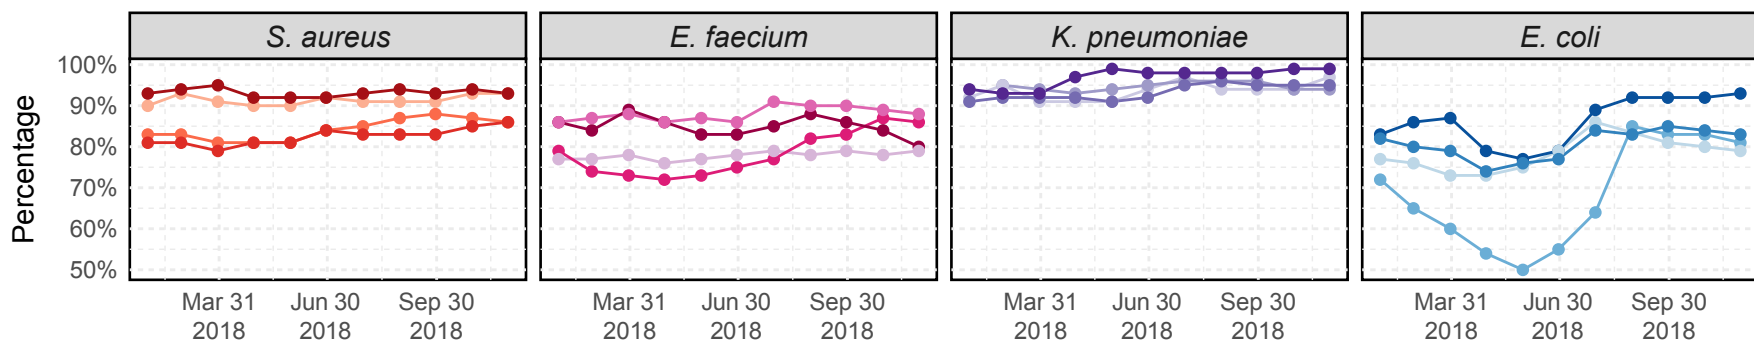

## C. Length of core SNP alignment

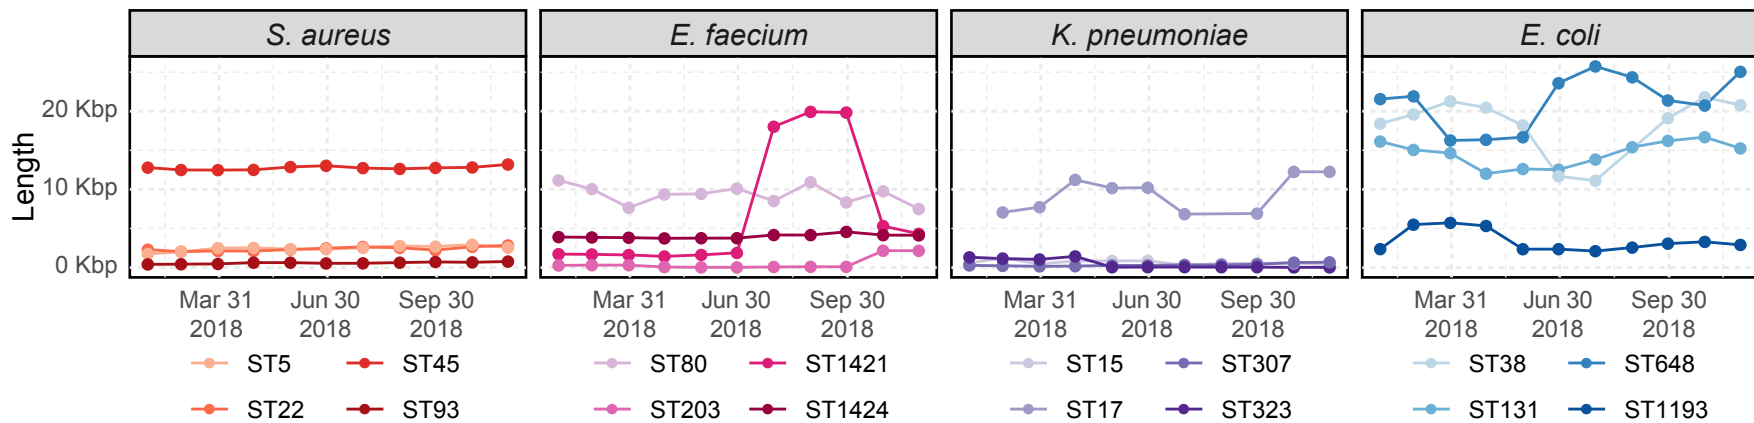

### A. *S. aureus*

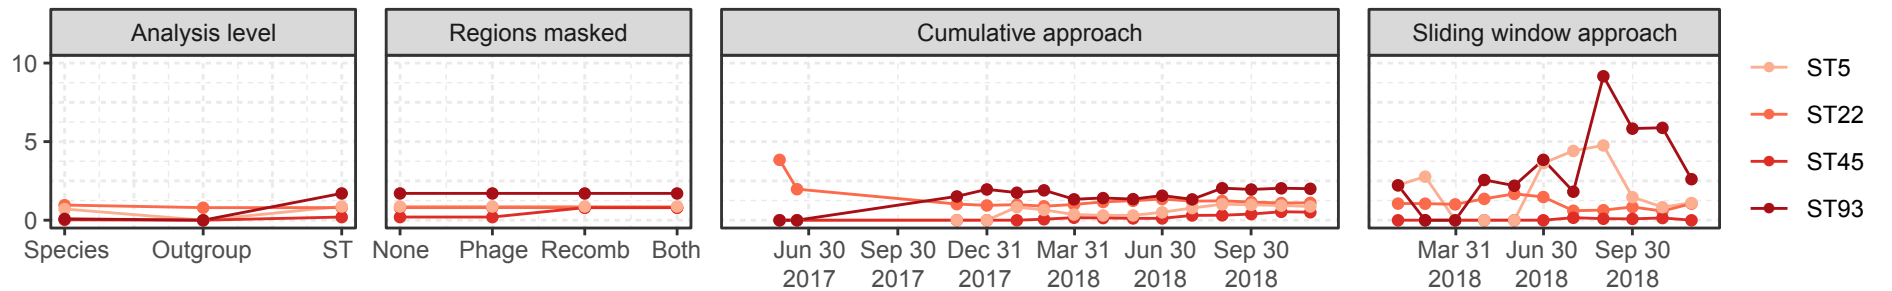

### B. *E. faecium*

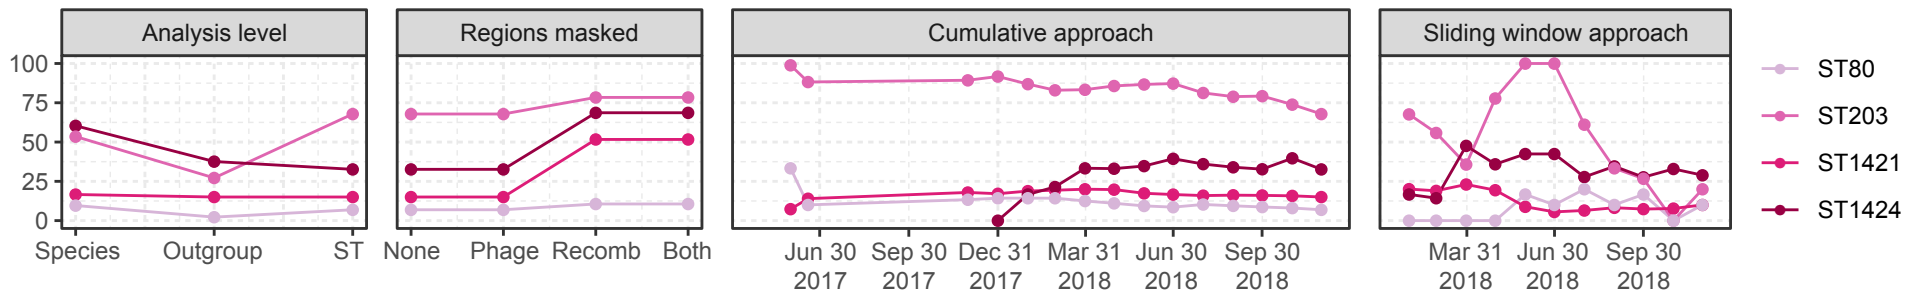

### C. *K. pneumoniae*

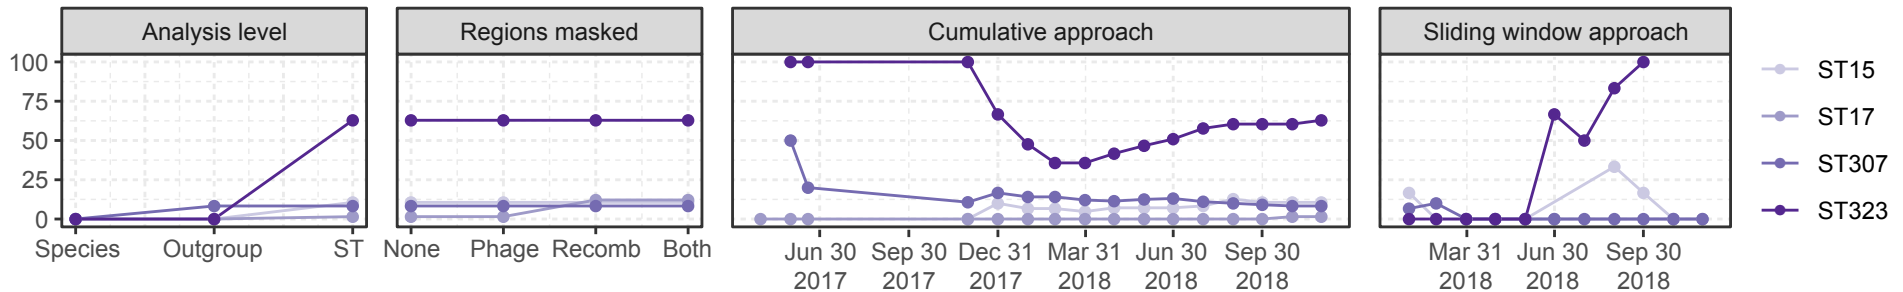

### D. *E. coli*

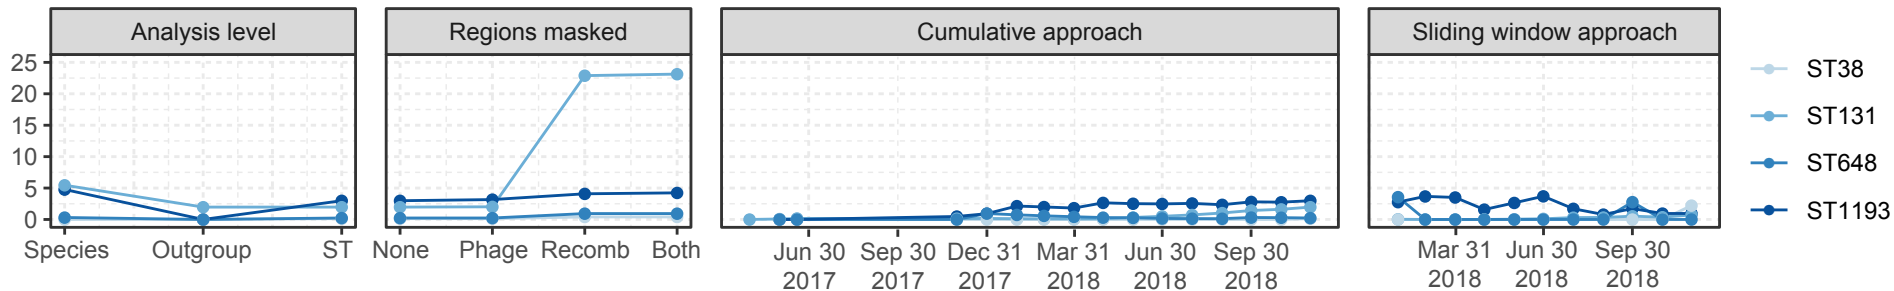

## A. Use a close reference and limit sample number and diversity (ie. all same ST) when possible

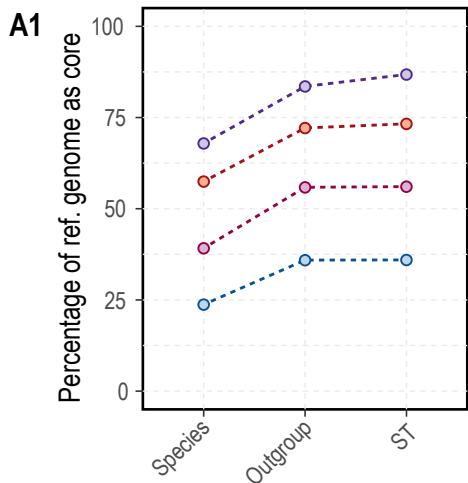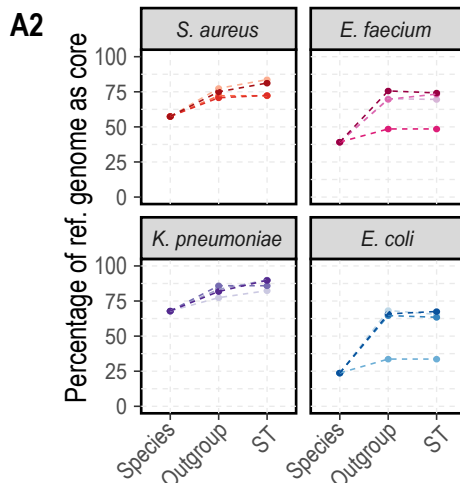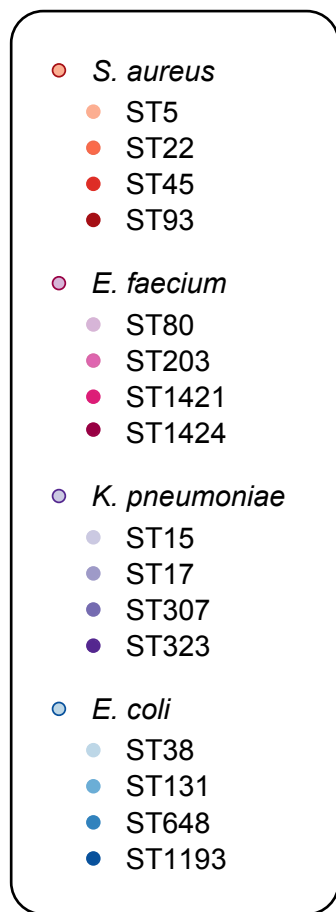

## B. Avoid masking recombination and prophage regions in transmission inference analysis

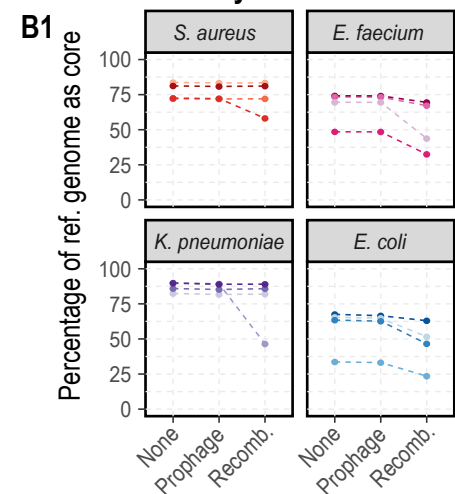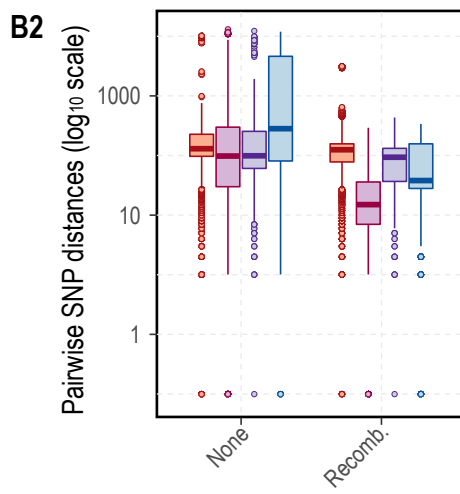

## C. Use a sliding window approach to improve and maintain pairwise SNP distance resolution and stability

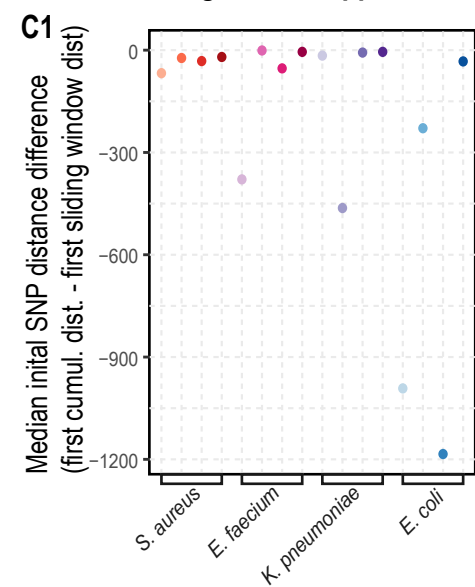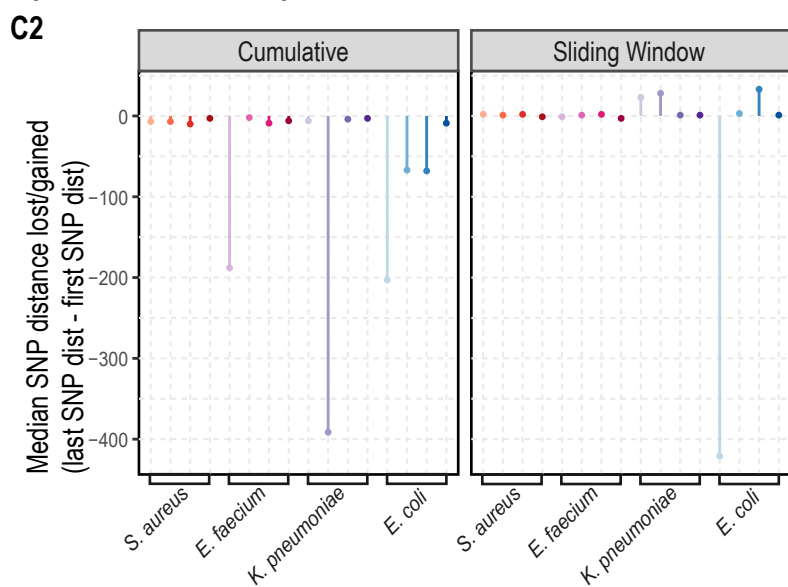

Source: http://biorxiv.org/content/10.1101/2020.09.24.310821v1.full.pdf
